# Supplementary material for: Prevalence, Comorbidity, and Sociodemographic Correlates of Psychiatric Disorders Reported in the All of Us Research Program
Source: PubMed Central journal article supplement (PMC9021986; doi:10.1001/jamapsychiatry.2022.0685), 2022-04-20
Supplement: jamapsychiatry-e220685-s001.pdf [file jamapsychiatry-e220685-s001.pdf]

# Supplemental Online Content

Barr PB, Bigdeli TB, Meyers JL. Prevalence, comorbidity, and sociodemographic correlates of psychiatric disorders reported in the All of Us research program. *JAMA Psychiatry*. Published online April 20, 2022. doi:10.1001/jamapsychiatry.2022.0685

## eAppendix

|          |                                                                                            |           |
|----------|--------------------------------------------------------------------------------------------|-----------|
| <b>1</b> | <b>STUDY INTRODUCTION</b>                                                                  | <b>2</b>  |
| <b>2</b> | <b>THE ALL OF US BIOBANK</b>                                                               | <b>3</b>  |
| 2.1      | PSYCHIATRIC DIAGNOSES                                                                      | 3         |
| 2.2      | SOCIODEMOGRAPHIC RISK FACTORS                                                              | 4         |
| <b>3</b> | <b>SENSITIVITY ANALYSES OF EHR-BASED PHENOTYPES</b>                                        | <b>6</b>  |
| <b>4</b> | <b>SOURCES FOR PREVALENCE OF PSYCHIATRIC DISORDERS</b>                                     | <b>10</b> |
|          | <b>eREFERENCES</b>                                                                         | <b>11</b> |
|          | <b>ETABLE 1: ICD10CM CODES AND CORRESPONDING PHECODES</b>                                  | <b>14</b> |
|          | <b>ETABLE 2: ALL OF US SAMPLE CHARACTERISTICS (N = 329,038)</b>                            | <b>35</b> |
|          | <b>ETABLE 3: PREVALENCE ACROSS ICD10CM CODE THRESHOLDS</b>                                 | <b>36</b> |
|          | <b>ETABLE 4: ADJUSTED ESTIMATES OF RISK FOR PSYCHIATRIC DISORDERS (3+ ICD CODES)</b>       | <b>37</b> |
|          | <b>ETABLE 5: ADJUSTED ESTIMATES OF RISK FOR PSYCHIATRIC DISORDERS (4+ ICD CODES)</b>       | <b>39</b> |
|          | <b>EFIGURE 1: PREVALENCE OF PSYCHIATRIC DISORDERS ACROSS SOCIODEMOGRAPHIC RISK FACTORS</b> | <b>5</b>  |
|          | <b>EFIGURE 2: PREVALENCE OF DISORDERS ACROSS ICD THRESHOLDS</b>                            | <b>7</b>  |
|          | <b>EFIGURE 3: COMORBIDITY OF DISORDERS ACROSS ICD THRESHOLDS</b>                           | <b>8</b>  |
|          | <b>EFIGURE 4: TETRACHORIC CORRELATIONS ACROSS THOSE WITH: (A) 3+ AND (B) 4+ ICD CODES</b>  | <b>9</b>  |

This supplemental material has been provided by the authors to give readers additional information about their work.

## eAppendix

### 1 STUDY INTRODUCTION

Psychiatric and substance use disorders remain an ever-present challenge to public health, incurring significant cost to affected individuals, their families, and society. Mental illness is estimated to contribute ~13% to the global burden of disease<sup>1</sup>. Conditions such as depression, anxiety, and substance use disorders are leading contributors to the burden of disease in the United States<sup>2</sup>. Psychiatric and substance use disorders also incur significant financial cost. In the United States, the estimated annual cost ranges from ~\$320 billion for serious mental illnesses<sup>3</sup> to ~\$78 billion for opioid use<sup>4</sup>. Importantly, these disorders rarely manifest in isolation, showing strong patterns of comorbidity and shared risk factors<sup>5-7</sup>.

Historically, estimating the prevalence of psychiatric disorders has relied on nationally representative or population-based surveys<sup>8-10</sup>, or through clinical ascertainment<sup>11</sup>. More recently, large-scale biobanks and healthcare systems are becoming increasingly used for research purposes. To date, resources such as the UK Biobank<sup>12</sup>, the Million Veteran Program<sup>13</sup>, Biobank Japan<sup>14</sup>, and FinnGen, among others, have proved to be an invaluable resource in the understanding of the causes of various psychiatric and related disorders. While valuable, these resources may not reflect the unique context within the US. Additionally, much of the research conducted in this area has focused primarily on individuals of European ancestries<sup>15,16</sup>. This is despite the previously observed differences in rates and patterns of psychiatric disorders by race-ethnicity, as well as known risk factors that are especially pertinent in the US given its sordid history with racism and inequality. In order to improve diversity in health-focused epidemiological research, further interrogate existing health disparities, and deliver on the promise of equitable precision medicine, the National Institutes of Health launched the All of Us program, a historic effort to collect and study data from at least one million people living in the United States<sup>17</sup>. Beginning in 2018, participants were able to complete surveys, provide genotypic data, and link their electronic health records to help build a comprehensive database of their health-related data. The goal of the All of Us program is to use this data to understand how biology, lifestyle and social determinants come together to affect health, and ultimately to treat and prevent illness.

The current analysis focuses on characterizing the prevalence, comorbidity, and sociodemographic disparities for psychiatric and substance use disorders in the All of Us database. We compare these estimates to those from nationally representative and population-based samples to help better understand the etiology of psychiatric disorders in All of Us, and the participants that make up this new sample.

## 2 THE ALL OF US BIOBANK

The All of Us Research Program is a prospective cohort study aiming to recruit at least one million individuals in the United States, with the overall goal of providing a unique resource to study the effects of lifestyle, environment and genomics on health and health outcomes. Participant recruitment is predominantly done through participating health care provider organizations and in partnership with Federally Qualified Health Centers, with an emphasis on recruiting persons affiliated with those centers. Interested potential participants can also enroll in the program as direct volunteers, visiting community-based enrollment sites. Initial enrollment, informed consent (including consent to share EHRs), and baseline health surveys are done digitally through the All of Us program website (<https://joinallofus.org>). Once this step is completed, the participant is invited to undergo a basic physical exam and biospecimen collection at the affiliated healthcare site. Participant follow-up is done in two ways, passively via linkage with EHR and actively by periodic follow-up surveys. For this study, we included data from participants enrolled in the study between May 6, 2018 and April 1st, 2021 (All of Us release 5, N = 331,380). This work was performed on data collected by the previously described All of Us Research Program using the All of Us Researcher Workbench, a cloud-based platform where approved researchers can access and analyze All of Us data. All analyses were in concordance with the ethical guidelines outlined in the All of Us Code of Conduct and the IRB at SUNY Downstate.

### 2.1 *Psychiatric Diagnoses*

We derived diagnoses based on phecodes from registered ICD10CM codes in the All of Us system. Individuals with 2+ ICD codes were considered as having a diagnosis, based on prior analyses in electronic health systems<sup>18</sup>. First, we selected all relevant ICD codes for the more prevalent psychiatric disorders. We then clustered these ICD codes using phecodes<sup>19</sup> from the *PheWAS* package in R<sup>20</sup>. Phecodes provide a convenient way to cluster codes in EHR based data<sup>21</sup> and have been validated previously<sup>21,22</sup>. A full list of the EHR descriptions, ICD10CM codes, and corresponding phecodes is provided in [eTable 1](#). We focused our main analyses on the following broad clusters of psychiatric disorders:

- Any mood disorder (MOOD): those with a registered diagnosis of major depressive disorder, dysthymic disorder, or bipolar disorder.
- Any anxiety disorder (ANX) : those with a registered diagnosis generalized anxiety disorder, social anxiety/agoraphobia, any phobia, or anxiety disorder (unspecified).

- Any substance use disorder (SUD): those with a registered diagnosis of an alcohol use disorder or other substance use disorder.
- Any stress-related disorder (STRESS): those with a registered diagnosis of post-traumatic stress disorder or an adjustment disorder.
- Schizophrenia (SCZ): those with any registered diagnosis of schizophrenia.
- Any personality disorder (PERS): those with a registered diagnosis of antisocial, borderline, or schizotypal personality disorder.

## 2.2 Sociodemographic Risk Factors

All of Us provides extensive measures of social and demographic characteristics. Where possible, we tried to match characteristics to other nationally representative samples<sup>8</sup>. A full breakdown of the sample characteristics is presented in [eTable 2](#). Our analyses included the following sociodemographic risk factors (as defined by the All of Us database):

- Age: ages 18-29 (reference), ages 30-44, ages 45-64, ages 65 and older
- Sex assigned at birth: female (reference), male, and those who selected neither male nor female
- Gender identity: woman (reference) man, and those who selected neither man nor women
- Sexual orientation: those who identify as straight/heterosexual (reference) vs. all others
- Race-ethnicity: non-Hispanic White (reference), Black/African American, Hispanic or Latino/a/x, Asian, other race-ethnicity, and those who identify as multiracial
- Educational attainment: less than high school (reference), high school diploma or equivalent, some college, and college degree or more
- Annual household income: under \$25K annually (reference), \$25K-\$50K annually, \$50K-\$75K annually, \$75K-\$100K annually, and \$100K or more annually
- Access to health insurance: those who report having insurance (reference) vs those who report no insurance
- Country of origin: US born (reference) vs foreign born

The raw prevalence for each group of disorder (mood, anxiety, substance, stress-related, schizophrenia, and personality) across each of the sociodemographic covariates is presented in eFigure 1.

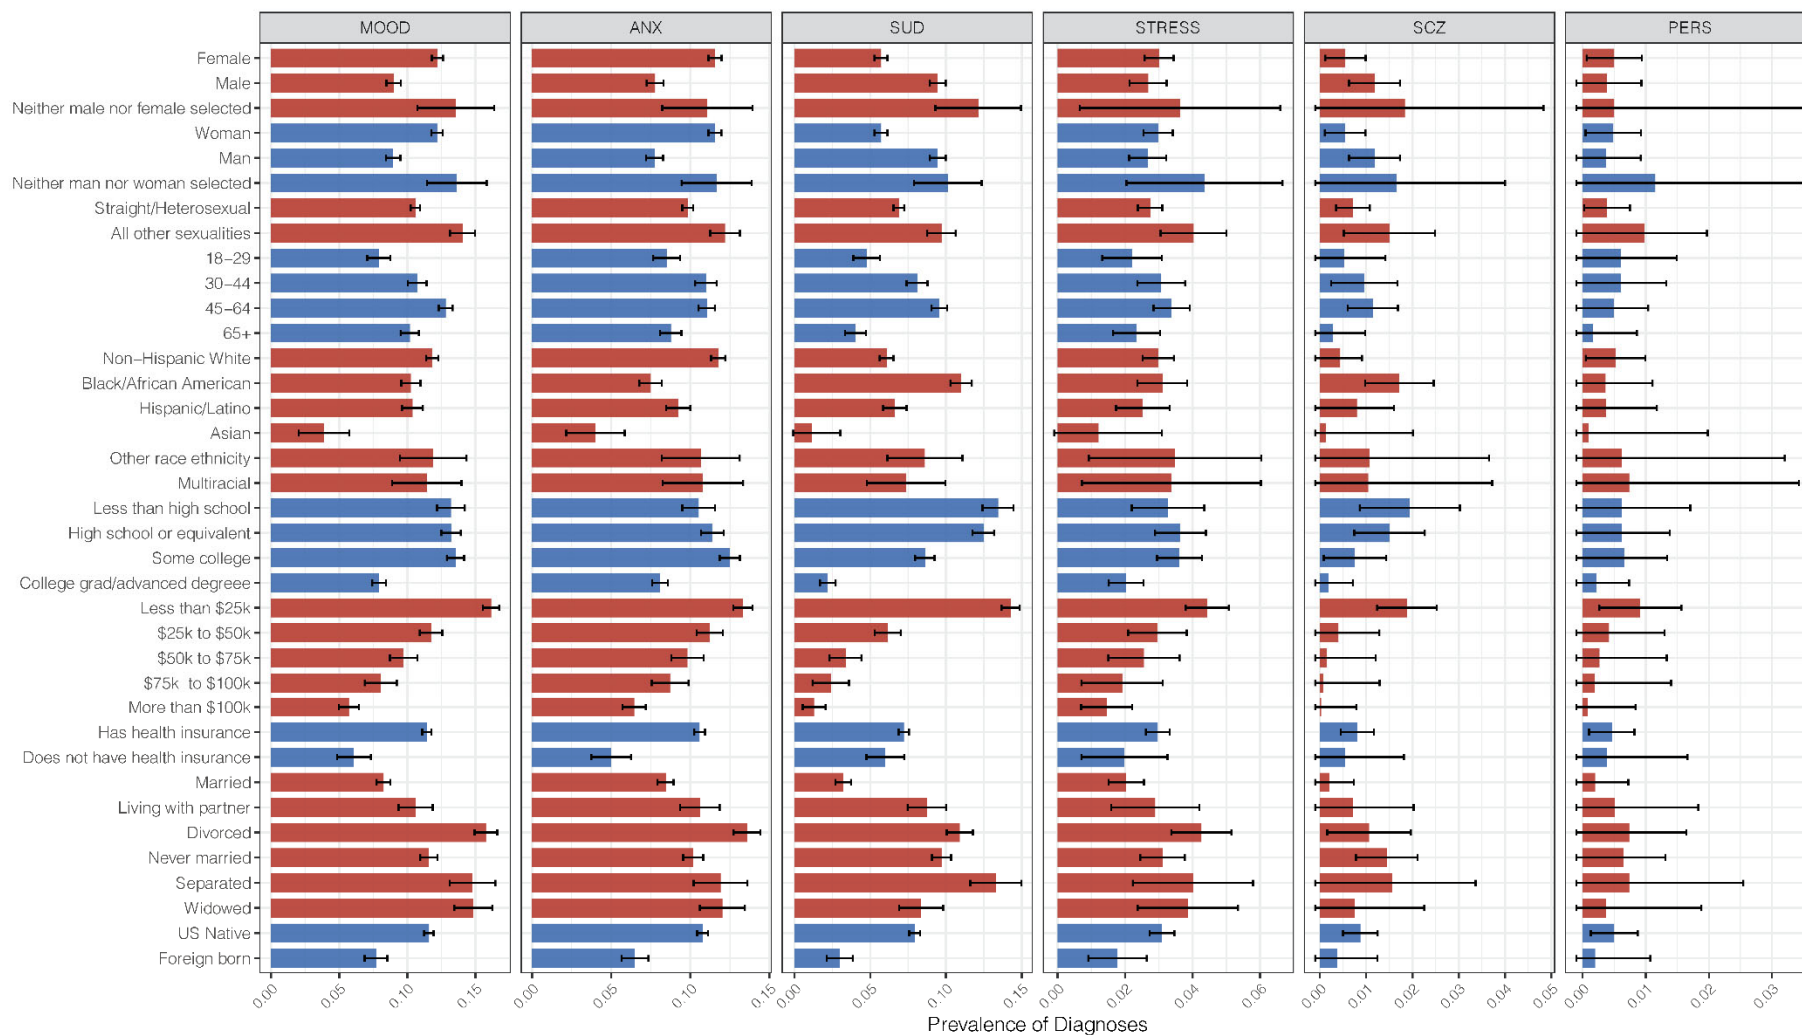

eFigure 1: Prevalence of Psychiatric Disorders across Sociodemographic Risk Factors

### 3 SENSITIVITY ANALYSES OF EHR-BASED PHENOTYPES

Using electronic health records (EHR) for research is a rapidly advancing area. Prior work in medical informatics has shown that using EHR based diagnoses and other administrative data to derive cases can vary across the type of disorder one considers, with more severe disorders generally demonstrating the most reliable measures<sup>23</sup>. Previous work in the PsycheMERGE consortium has used the standard of two or more registered ICD codes as the definition for being considered a “case”<sup>18</sup>.

In order to determine whether more stringent definitions of being a “case” altered the prevalence of psychiatric problems in the All of Us database, we ran a series of sensitivity analyses. We restricted the definition of having disorder from 1 or more registered ICD codes and up to 4 or more registered ICD codes. Across all disorders, the total number of “cases” (not mutually exclusive) dropped as thresholds became more restrictive (Total cases 1+ ICD code(s) = 202,422; Total cases 2+ ICD codes = 137,265, Total cases 3+ ICD codes = 106,737; Total cases 4+ ICD codes 88,093). eFigure 2 presents the drop in those meeting criteria of being a “case” as the threshold becomes more restrictive for each disorder included in the analysis. Overall, each disorder follows a similar pattern regardless of the prevalence of that disorder (see [eTable 3](#) for exact counts by disorder). Additionally, when we look at the patterns of comorbidity across ICD thresholds (eFigure 3), we see that these patterns are largely unchanged from using any diagnosis, with the exception that mood disorders became slightly more prevalent than SUD for those with only one registered diagnosis. The main difference is related to the difference in the raw prevalence across thresholds above: as we are more restrictive, fewer participants meet criteria for a given disorder. Regardless of the threshold for defining cases, we see that the correlation between disorders is approximately the same (eFigure 4). Finally, estimates for risk across sociodemographic covariates is relatively stable to inclusion threshold (see [eTable4](#) and [eTable5](#)).

Use of diagnoses based on single ICD codes represent a “best-case scenario” for those interested in psychiatric disorders in the All of Us biobank. We have no “gold standard” measurement (such as a physician chart review or Structured Clinical Interview for DSM Disorders confirmed diagnoses<sup>24</sup>) to validate each threshold. However, future research can leverage the genetic data to compare genetic correlations across thresholds with results from published genome wide association studies (GWAS) of confirmed cases. For example, research with the Alcohol Use Disorder Identification Test (AUDIT), has followed this approach and identified AUDIT thresholds that are most likely to capture those who meet criteria for AUD<sup>25</sup>.

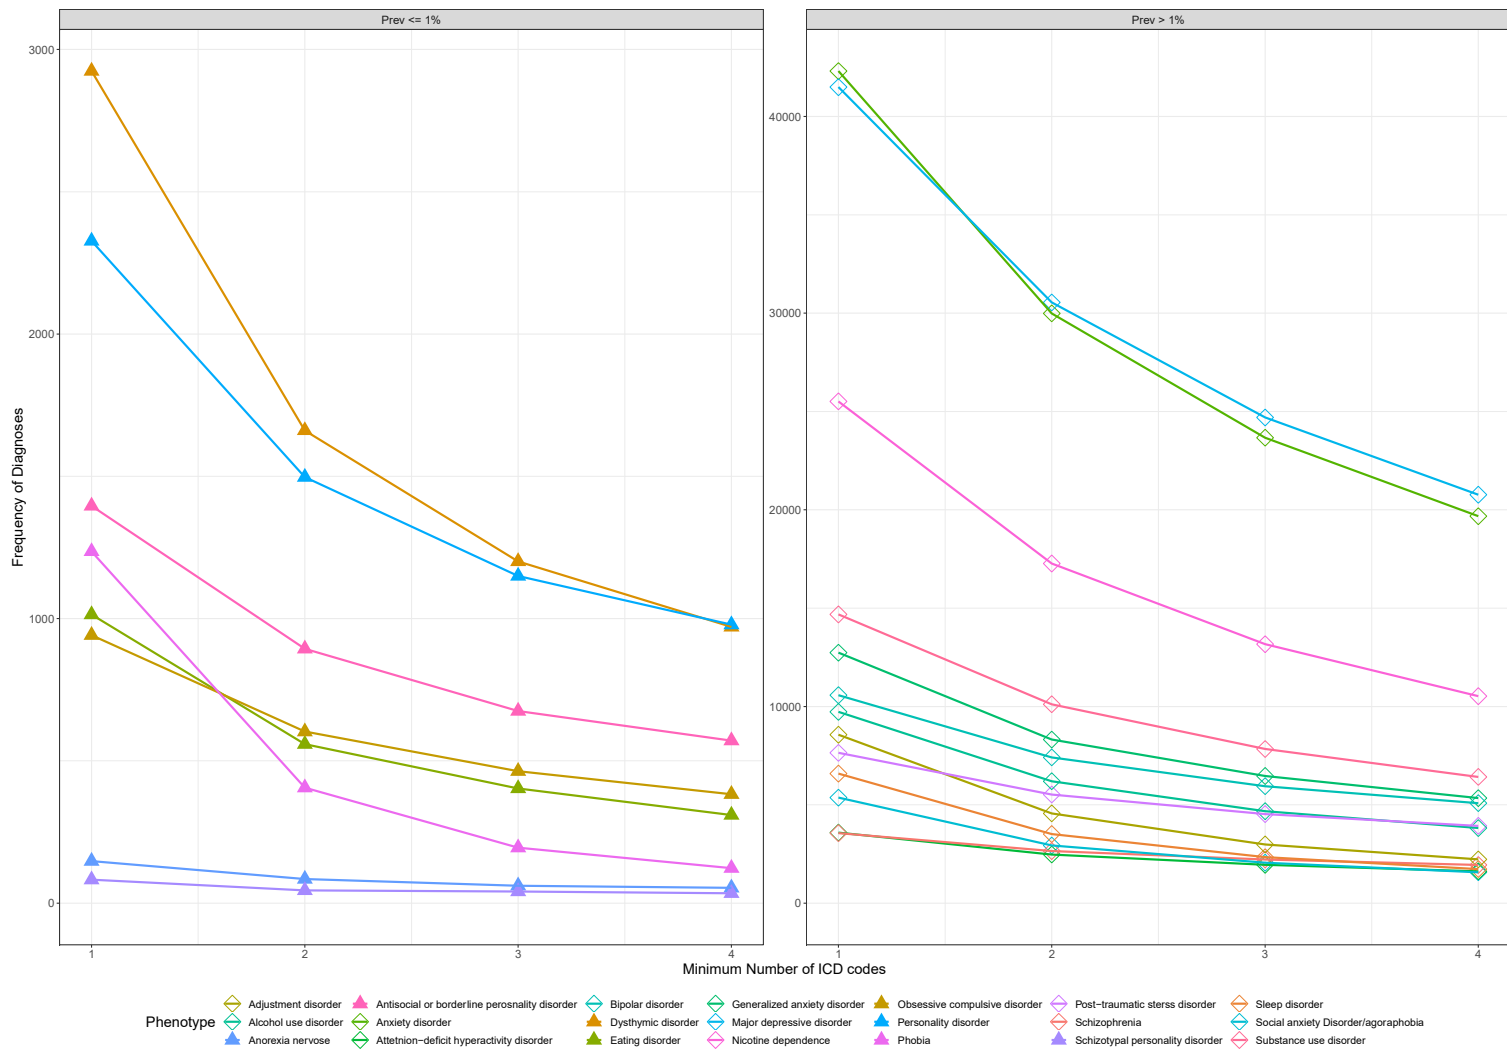

*eFigure 2: Prevalence of Disorders Across ICD Thresholds*

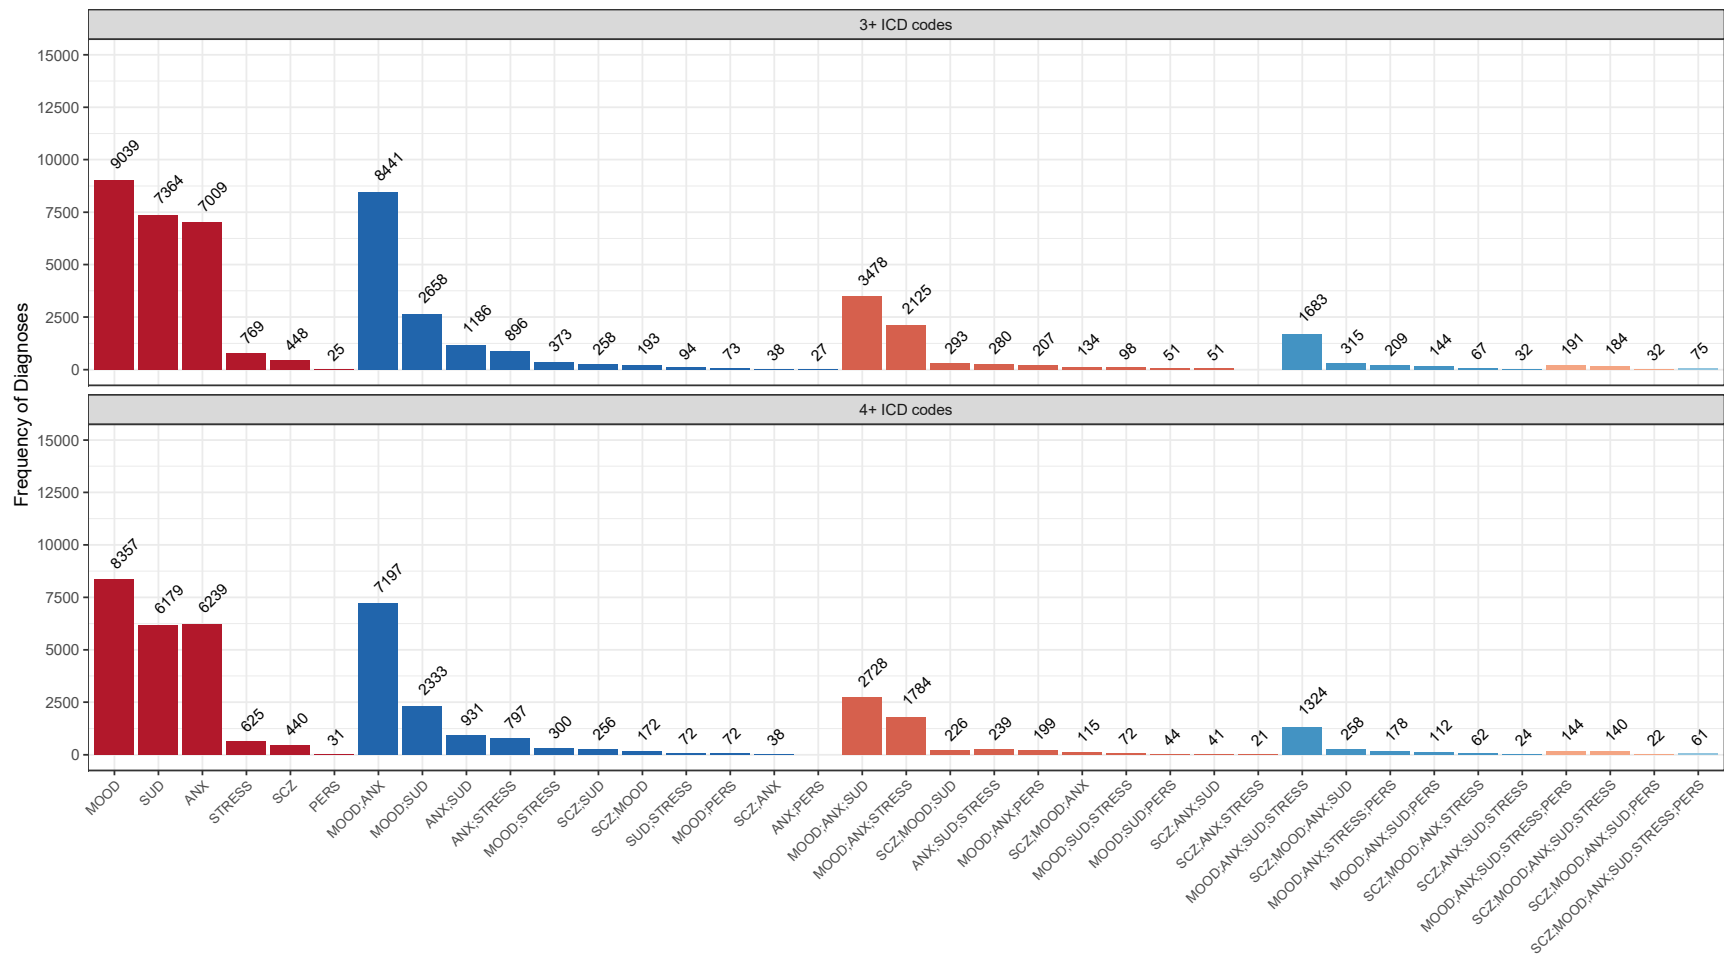

eFigure 3: Comorbidity of Disorders Across ICD Thresholds



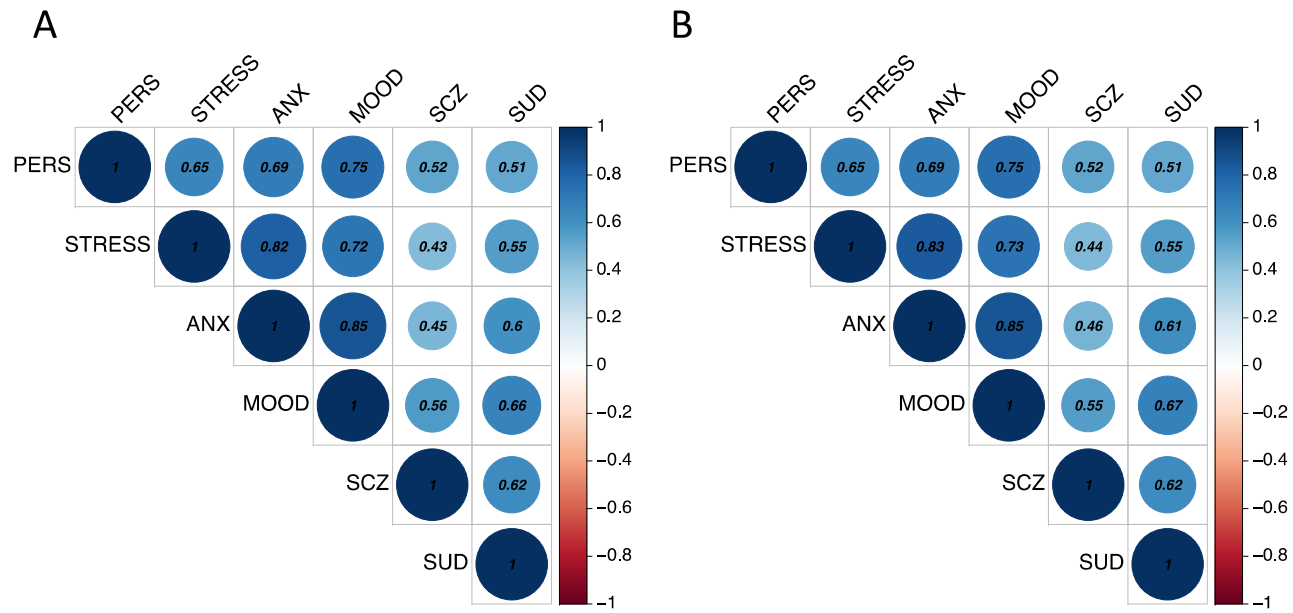

eFigure 4: Tetrachoric Correlations Across Those with: (A) 3+ and (B) 4+ ICD Codes

#### 4 SOURCES FOR PREVALENCE OF PSYCHIATRIC DISORDERS

The prevalence of each disorder is lower than the those from nationally representative samples<sup>6-8,26-31</sup>. Below are the sources for estimates of prevalence in the general population.

| Phenotype                                              | Population Prevalence | DOI                              | Reference |
|--------------------------------------------------------|-----------------------|----------------------------------|-----------|
| Major depressive disorder                              | 16.6%                 | 10.1001/archpsyc.62.6.593        | 31        |
| Bipolar                                                | 3.9%                  | 10.1001/archpsyc.62.6.593        | 31        |
| Dysthymic disorder                                     | 2.5%                  | 10.1001/archpsyc.62.6.593        | 31        |
| Any mood disorder                                      | 20.8%                 | 10.1001/archpsyc.62.6.593        | 31        |
| Generalized anxiety disorder                           | 5.7%                  | 10.1001/archpsyc.62.6.593        | 31        |
| Social anxiety disorder/Agoraphobia                    | 12.1/1.4%             | 10.1001/archpsyc.62.6.593        | 31        |
| Phobia                                                 | 12.5%                 | 10.1001/archpsyc.62.6.593        | 31        |
| Any anxiety disorder                                   | 28.8%                 | 10.1001/archpsyc.62.6.593        | 31        |
| Alcohol use disorder                                   | 29.1%                 | 10.1001/jamapsychiatry.2015.0584 | 6         |
| Drug use disorder                                      | 9.9%                  | 10.1001/jamapsychiatry.2015.2132 | 7         |
| Tobacco use disorder                                   | 17.7%                 | 10.1007/s00127-015-1088-0        | 8         |
| Any substance use disorder                             | 32.3%                 | 10.1007/s00127-015-1088-0        | 8         |
| Post-traumatic stress disorder                         | 6.1%                  | 10.1007/s00127-016-1208-5        | 30        |
| Sleep disorder                                         | 5.6%                  | 10.1016/S0022-3956(97)00002-2    | 28        |
| Schizophrenia                                          | 0.9%                  | 10.1001/archpsyc.64.1.19         | 29        |
| Attention-deficit/hyperactivity disorder               | 8.1%                  | 10.1001/archpsyc.62.6.593        | 31        |
| Antisocial personality/Borderline personality disorder | 3.8/2.7%              | 10.1521/pedi.2010.24.4.412       | 27        |
| Shizotypal personality disorder                        | 0.6%                  | 10.1521/pedi.2010.24.4.412       | 27        |
| Any personality disorder                               | 0.3 - 2.7%            | 10.1521/pedi.2010.24.4.412       | 27        |
| Eating Disorder                                        | 8.4/2.2%              | 10.1093/ajcn/nqy342              | 26        |
| Obsessive compulsive disorder                          | 1.9%                  | 10.1521/pedi.2010.24.4.41        | 27        |

## 5 REFERENCES

1. Vigo D, Thornicroft G, Atun R. Estimating the true global burden of mental illness. *The Lancet Psychiatry*. 2016;3(2):171-178. doi:10.1016/S2215-0366(15)00505-2
2. Murray CJL, Mokdad AH, Ballestros K, et al. The state of US health, 1990-2016: Burden of diseases, injuries, and risk factors among US states. *JAMA - J Am Med Assoc*. 2018;319(14):1444-1472. doi:10.1001/jama.2018.0158
3. Insel TR. Assessing the economic costs of serious mental illness. *Am J Psychiatry*. 2008;165(6):663-665. doi:10.1176/appi.ajp.2008.08030366
4. Florence CS, Zhou C, Luo F, Xu L. The Economic Burden of Prescription Opioid Overdose, Abuse, and Dependence in the United States, 2013. *Med Care*. 2016;54(10):901-906. doi:10.1097/MLR.0000000000000625
5. Kessler R, Chiu W. Prevalence, Severity, and Comorbidity of Twelve-month DSM-IV Disorders in the National Comorbidity Survey Replication (NCS- R). *Arch Gen ...* 2005;62(6):617-627. doi:10.1001/archpsyc.62.6.617.Prevalence
6. Grant BF, Goldstein RB, Saha TD, et al. Epidemiology of DSM-5 Alcohol Use Disorder: Results From the National Epidemiologic Survey on Alcohol and Related Conditions III. *JAMA Psychiatry*. 2015;72(8):757-766. doi:10.1001/jamapsychiatry.2015.0584
7. Grant BF, Saha TD, June Ruan W, et al. Epidemiology of DSM-5 drug use disorder results from the national epidemiologic survey on alcohol and related conditions-III. *JAMA Psychiatry*. 2016;73(1):39-47. doi:10.1001/jamapsychiatry.2015.2132
8. Hasin DS, Grant BF. The National Epidemiologic Survey on Alcohol and Related Conditions (NESARC) Waves 1 and 2: review and summary of findings. *Soc Psychiatry Psychiatr Epidemiol*. 2015;50(11):1609-1640. doi:10.1007/s00127-015-1088-0
9. Kessler RC, Merikangas KR. The National Comorbidity Survey Replication (NCS-R): Background and aims. *Int J Methods Psychiatr Res*. 2004;13(2):60-68. doi:10.1002/mpr.166
10. Demyttenaere K, Bruffaerts R, Posada-Villa J, et al. Prevalence, severity, and unmet need for treatment of mental disorders in the World Health Organization World Mental Health Surveys. *J Am Med Assoc*. 2004;291(21):2581-2590. doi:10.1001/jama.291.21.2581
11. Warden D, Rush AJ, Trivedi MH, Fava M, Wisniewski SR. The STAR\*D project results: A comprehensive review of findings. *Curr Psychiatry Rep*. 2007;9(6):449-459. doi:10.1007/s11920-007-0061-3
12. Bycroft C, Freeman C, Petkova D, et al. The UK Biobank resource with deep phenotyping

- and genomic data. *Nature*. 2018;562(7726):203-209. doi:10.1038/s41586-018-0579-z
13. Gaziano JM, Concato J, Brophy M, et al. Million Veteran Program: A mega-biobank to study genetic influences on health and disease. *J Clin Epidemiol*. 2016;70:214-223. doi:10.1016/j.jclinepi.2015.09.016
  14. Nagai A, Hirata M, Kamatani Y, et al. Overview of the BioBank Japan Project: Study design and profile. *J Epidemiol*. 2017;27(3):S2-S8. doi:10.1016/j.je.2016.12.005
  15. Mills MC, Rahal C. A scientometric review of genome-wide association studies. *Commun Biol*. 2019;2(1):9. doi:10.1038/s42003-018-0261-x
  16. Martin AR, Kanai M, Kamatani Y, Okada Y, Neale BM, Daly MJ. Clinical use of current polygenic risk scores may exacerbate health disparities. *Nat Genet*. 2019;51(4):584-591. doi:10.1038/s41588-019-0379-x
  17. The All of Us Research Program Investigators. The “All of Us” Research Program. *N Engl J Med*. 2019;381(7):668-676. doi:10.1056/nejmsr1809937
  18. Zheutlin AB, Dennis J, Linnér RK, et al. Penetrance and pleiotropy of polygenic risk scores for schizophrenia in 106,160 patients across four health care systems. *Am J Psychiatry*. 2019;176(10):846-855. doi:10.1176/appi.ajp.2019.18091085
  19. Denny JC, Bastarache L, Ritchie MD, et al. Systematic comparison of phenome-wide association study of electronic medical record data and genome-wide association study data. *Nat Biotechnol*. 2013;31(12):1102-1110. doi:10.1038/nbt.2749
  20. Carroll RJ, Bastarache L, Denny JC. R PheWAS: Data analysis and plotting tools for phenome-wide association studies in the R environment. *Bioinformatics*. 2014;30(16):2375-2376. doi:10.1093/bioinformatics/btu197
  21. Wei W-Q, Bastarache LA, Carroll RJ, et al. Evaluating phecodes, clinical classification software, and ICD-9-CM codes for phenome-wide association studies in the electronic health record. *PLoS One*. 2017;12(7):e0175508.
  22. Wei WQ, Teixeira PL, Mo H, Cronin RM, Warner JL, Denny JC. Combining billing codes, clinical notes, and medications from electronic health records provides superior phenotyping performance. *J Am Med Informatics Assoc*. 2016;23(e1):20-27. doi:10.1093/jamia/ocv130
  23. Davis KAS, Sudlow CLM, Hotopf M. Can mental health diagnoses in administrative data be used for research? A systematic review of the accuracy of routinely collected diagnoses. *BMC Psychiatry*. 2016;16(1):1-11. doi:10.1186/s12888-016-0963-x
  24. Castro VM, Minnier J, Murphy SN, et al. Validation of electronic health record phenotyping of bipolar disorder cases and controls. *Am J Psychiatry*. 2015;172(4):363-372.

doi:10.1176/appi.ajp.2014.14030423

25. Sanchez-Roige S, Palmer AA, Fontanillas P, et al. Genome-wide association study meta-analysis of the alcohol use disorders identification test (AUDIT) in two population-based cohorts. *Am J Psychiatry*. 2019;176(2):107-118. doi:10.1176/appi.ajp.2018.18040369
26. Galmiche M, Déchelotte P, Lambert G, Tavolacci MP. Prevalence of eating disorders over the 2000-2018 period: A systematic literature review. *Am J Clin Nutr*. 2019;109(5):1402-1413. doi:10.1093/ajcn/nqy342
27. Trull TJ, Jahng S, Tomko RL, Wood PK, Sher KJ. Revised NESARC personality disorder diagnoses: Gender, prevalence, and comorbidity with substance dependence disorders. *J Pers Disord*. 2010;24(4):412-426. doi:10.1521/pedi.2010.24.4.412
28. Ohayon MM. Prevalence of DSM-IV diagnostic criteria of insomnia: Distinguishing insomnia related to mental disorders from sleep disorders. *J Psychiatr Res*. 1997;31(3):333-346. doi:10.1016/S0022-3956(97)00002-2
29. Perälä J, Suvisaari J, Saarni SI, et al. Lifetime prevalence of psychotic and bipolar I disorders in a general population. *Arch Gen Psychiatry*. 2007;64(1):19-28. doi:10.1001/archpsyc.64.1.19
30. Goldstein RB, Smith SM, Chou SP, et al. The epidemiology of DSM-5 posttraumatic stress disorder in the United States: results from the National Epidemiologic Survey on Alcohol and Related Conditions-III. *Soc Psychiatry Psychiatr Epidemiol*. 2016;51(8):1137-1148. doi:10.1007/s00127-016-1208-5
31. Kessler RC, Berglund P, Demler O, et al. Lifetime prevalence and age-of-onset distributions of DSM-IV disorders in the National Comorbidity Survey Replication. *Arch Gen Psychiatry*. 2005;62(6):593. doi:10.1001/archpsyc.62.6.593

**6 ETABLE 1: ICD10CM CODES AND CORRESPONDING PHECODES**

| <u>ICD10CM code</u> | <u>Phecode</u> | <u>ICD10CM description</u>                | <u>Phecode description</u>                  |
|---------------------|----------------|-------------------------------------------|---------------------------------------------|
| F20                 | 295            | Schizophrenia                             | Schizophrenia and other psychotic disorders |
| F20                 | 295            | Schizophrenia                             | Schizophrenia and other psychotic disorders |
| F20.0               | 295            | Paranoid schizophrenia                    | Schizophrenia and other psychotic disorders |
| F20.0               | 295            | Paranoid schizophrenia                    | Schizophrenia and other psychotic disorders |
| F20.1               | 295            | Disorganized schizophrenia                | Schizophrenia and other psychotic disorders |
| F20.1               | 295            | Disorganized schizophrenia                | Schizophrenia and other psychotic disorders |
| F20.2               | 295            | Catatonic schizophrenia                   | Schizophrenia and other psychotic disorders |
| F20.2               | 295            | Catatonic schizophrenia                   | Schizophrenia and other psychotic disorders |
| F20.3               | 295            | Undifferentiated schizophrenia            | Schizophrenia and other psychotic disorders |
| F20.3               | 295            | Undifferentiated schizophrenia            | Schizophrenia and other psychotic disorders |
| F20.5               | 295            | Residual schizophrenia                    | Schizophrenia and other psychotic disorders |
| F20.5               | 295            | Residual schizophrenia                    | Schizophrenia and other psychotic disorders |
| F20.81              | 295            | Schizophreniform disorder                 | Schizophrenia and other psychotic disorders |
| F20.81              | 295            | Schizophreniform disorder                 | Schizophrenia and other psychotic disorders |
| F20.89              | 295            | Other schizophrenia                       | Schizophrenia and other psychotic disorders |
| F20.89              | 295            | Other schizophrenia                       | Schizophrenia and other psychotic disorders |
| F20.9               | 295            | Schizophrenia, unspecified                | Schizophrenia and other psychotic disorders |
| F20.9               | 295            | Schizophrenia, unspecified                | Schizophrenia and other psychotic disorders |
| F25                 | 295            | Schizoaffective disorders                 | Schizophrenia and other psychotic disorders |
| F25                 | 295            | Schizoaffective disorders                 | Schizophrenia and other psychotic disorders |
| F25.0               | 295            | Schizoaffective disorder, bipolar type    | Schizophrenia and other psychotic disorders |
| F25.0               | 295            | Schizoaffective disorder, bipolar type    | Schizophrenia and other psychotic disorders |
| F25.1               | 295            | Schizoaffective disorder, depressive type | Schizophrenia and other psychotic disorders |
| F25.1               | 295            | Schizoaffective disorder, depressive type | Schizophrenia and other psychotic disorders |
| F25.8               | 295            | Other schizoaffective disorders           | Schizophrenia and other psychotic disorders |
| F25.8               | 295            | Other schizoaffective disorders           | Schizophrenia and other psychotic disorders |
| F25.9               | 295            | Schizoaffective disorder, unspecified     | Schizophrenia and other psychotic disorders |
| F25.9               | 295            | Schizoaffective disorder, unspecified     | Schizophrenia and other psychotic disorders |
| F20                 | 295.1          | Schizophrenia                             | Schizophrenia                               |
| F20                 | 295.1          | Schizophrenia                             | Schizophrenia                               |
| F20.0               | 295.1          | Paranoid schizophrenia                    | Schizophrenia                               |
| F20.0               | 295.1          | Paranoid schizophrenia                    | Schizophrenia                               |

|        |       |                                                                                     |                |
|--------|-------|-------------------------------------------------------------------------------------|----------------|
| F20.1  | 295.1 | Disorganized schizophrenia                                                          | Schizophrenia  |
| F20.1  | 295.1 | Disorganized schizophrenia                                                          | Schizophrenia  |
| F20.2  | 295.1 | Catatonic schizophrenia                                                             | Schizophrenia  |
| F20.2  | 295.1 | Catatonic schizophrenia                                                             | Schizophrenia  |
| F20.3  | 295.1 | Undifferentiated schizophrenia                                                      | Schizophrenia  |
| F20.3  | 295.1 | Undifferentiated schizophrenia                                                      | Schizophrenia  |
| F20.5  | 295.1 | Residual schizophrenia                                                              | Schizophrenia  |
| F20.5  | 295.1 | Residual schizophrenia                                                              | Schizophrenia  |
| F20.81 | 295.1 | Schizophreniform disorder                                                           | Schizophrenia  |
| F20.81 | 295.1 | Schizophreniform disorder                                                           | Schizophrenia  |
| F20.89 | 295.1 | Other schizophrenia                                                                 | Schizophrenia  |
| F20.89 | 295.1 | Other schizophrenia                                                                 | Schizophrenia  |
| F20.9  | 295.1 | Schizophrenia, unspecified                                                          | Schizophrenia  |
| F20.9  | 295.1 | Schizophrenia, unspecified                                                          | Schizophrenia  |
| F25    | 295.1 | Schizoaffective disorders                                                           | Schizophrenia  |
| F25    | 295.1 | Schizoaffective disorders                                                           | Schizophrenia  |
| F25.0  | 295.1 | Schizoaffective disorder, bipolar type                                              | Schizophrenia  |
| F25.0  | 295.1 | Schizoaffective disorder, bipolar type                                              | Schizophrenia  |
| F25.1  | 295.1 | Schizoaffective disorder, depressive type                                           | Schizophrenia  |
| F25.1  | 295.1 | Schizoaffective disorder, depressive type                                           | Schizophrenia  |
| F25.8  | 295.1 | Other schizoaffective disorders                                                     | Schizophrenia  |
| F25.8  | 295.1 | Other schizoaffective disorders                                                     | Schizophrenia  |
| F25.9  | 295.1 | Schizoaffective disorder, unspecified                                               | Schizophrenia  |
| F25.9  | 295.1 | Schizoaffective disorder, unspecified                                               | Schizophrenia  |
| F31    | 296   | Bipolar disorder                                                                    | Mood disorders |
| F31    | 296   | Bipolar disorder                                                                    | Mood disorders |
| F31.0  | 296   | Bipolar disorder, current episode hypomanic                                         | Mood disorders |
| F31.0  | 296   | Bipolar disorder, current episode hypomanic                                         | Mood disorders |
| F31.10 | 296   | Bipolar disorder, current episode manic without psychotic features, unspecified     | Mood disorders |
| F31.10 | 296   | Bipolar disorder, current episode manic without psychotic features, unspecified     | Mood disorders |
| F31.11 | 296   | Bipolar disorder, current episode manic without psychotic features, mild            | Mood disorders |
| F31.11 | 296   | Bipolar disorder, current episode manic without psychotic features, mild            | Mood disorders |
| F31.12 | 296   | Bipolar disorder, current episode manic without psychotic features, moderate        | Mood disorders |
| F31.12 | 296   | Bipolar disorder, current episode manic without psychotic features, moderate        | Mood disorders |
| F31.13 | 296   | Bipolar disorder, current episode manic without psychotic features, severe          | Mood disorders |
| F31.13 | 296   | Bipolar disorder, current episode manic without psychotic features, severe          | Mood disorders |
| F31.2  | 296   | Bipolar disorder, current episode manic severe with psychotic features              | Mood disorders |
| F31.2  | 296   | Bipolar disorder, current episode manic severe with psychotic features              | Mood disorders |
| F31.30 | 296   | Bipolar disorder, current episode depressed, mild or moderate severity, unspecified | Mood disorders |

|        |     |                                                                                     |                |
|--------|-----|-------------------------------------------------------------------------------------|----------------|
| F31.30 | 296 | Bipolar disorder, current episode depressed, mild or moderate severity, unspecified | Mood disorders |
| F31.31 | 296 | Bipolar disorder, current episode depressed, mild                                   | Mood disorders |
| F31.31 | 296 | Bipolar disorder, current episode depressed, mild                                   | Mood disorders |
| F31.32 | 296 | Bipolar disorder, current episode depressed, moderate                               | Mood disorders |
| F31.32 | 296 | Bipolar disorder, current episode depressed, moderate                               | Mood disorders |
| F31.4  | 296 | Bipolar disorder, current episode depressed, severe, without psychotic features     | Mood disorders |
| F31.4  | 296 | Bipolar disorder, current episode depressed, severe, without psychotic features     | Mood disorders |
| F31.5  | 296 | Bipolar disorder, current episode depressed, severe, with psychotic features        | Mood disorders |
| F31.5  | 296 | Bipolar disorder, current episode depressed, severe, with psychotic features        | Mood disorders |
| F31.60 | 296 | Bipolar disorder, current episode mixed, unspecified                                | Mood disorders |
| F31.60 | 296 | Bipolar disorder, current episode mixed, unspecified                                | Mood disorders |
| F31.61 | 296 | Bipolar disorder, current episode mixed, mild                                       | Mood disorders |
| F31.61 | 296 | Bipolar disorder, current episode mixed, mild                                       | Mood disorders |
| F31.62 | 296 | Bipolar disorder, current episode mixed, moderate                                   | Mood disorders |
| F31.62 | 296 | Bipolar disorder, current episode mixed, moderate                                   | Mood disorders |
| F31.63 | 296 | Bipolar disorder, current episode mixed, severe, without psychotic features         | Mood disorders |
| F31.63 | 296 | Bipolar disorder, current episode mixed, severe, without psychotic features         | Mood disorders |
| F31.64 | 296 | Bipolar disorder, current episode mixed, severe, with psychotic features            | Mood disorders |
| F31.64 | 296 | Bipolar disorder, current episode mixed, severe, with psychotic features            | Mood disorders |
| F31.70 | 296 | Bipolar disorder, currently in remission, most recent episode unspecified           | Mood disorders |
| F31.70 | 296 | Bipolar disorder, currently in remission, most recent episode unspecified           | Mood disorders |
| F31.71 | 296 | Bipolar disorder, in partial remission, most recent episode hypomanic               | Mood disorders |
| F31.71 | 296 | Bipolar disorder, in partial remission, most recent episode hypomanic               | Mood disorders |
| F31.72 | 296 | Bipolar disorder, in full remission, most recent episode hypomanic                  | Mood disorders |
| F31.72 | 296 | Bipolar disorder, in full remission, most recent episode hypomanic                  | Mood disorders |
| F31.73 | 296 | Bipolar disorder, in partial remission, most recent episode manic                   | Mood disorders |
| F31.73 | 296 | Bipolar disorder, in partial remission, most recent episode manic                   | Mood disorders |
| F31.74 | 296 | Bipolar disorder, in full remission, most recent episode manic                      | Mood disorders |
| F31.74 | 296 | Bipolar disorder, in full remission, most recent episode manic                      | Mood disorders |
| F31.75 | 296 | Bipolar disorder, in partial remission, most recent episode depressed               | Mood disorders |
| F31.75 | 296 | Bipolar disorder, in partial remission, most recent episode depressed               | Mood disorders |
| F31.76 | 296 | Bipolar disorder, in full remission, most recent episode depressed                  | Mood disorders |
| F31.76 | 296 | Bipolar disorder, in full remission, most recent episode depressed                  | Mood disorders |
| F31.77 | 296 | Bipolar disorder, in partial remission, most recent episode mixed                   | Mood disorders |
| F31.77 | 296 | Bipolar disorder, in partial remission, most recent episode mixed                   | Mood disorders |
| F31.78 | 296 | Bipolar disorder, in full remission, most recent episode mixed                      | Mood disorders |
| F31.78 | 296 | Bipolar disorder, in full remission, most recent episode mixed                      | Mood disorders |
| F31.81 | 296 | Bipolar II disorder                                                                 | Mood disorders |
| F31.81 | 296 | Bipolar II disorder                                                                 | Mood disorders |



|        |     |                                                                              |                |
|--------|-----|------------------------------------------------------------------------------|----------------|
| F31.89 | 296 | Other bipolar disorder                                                       | Mood disorders |
| F31.89 | 296 | Other bipolar disorder                                                       | Mood disorders |
| F31.9  | 296 | Bipolar disorder, unspecified                                                | Mood disorders |
| F31.9  | 296 | Bipolar disorder, unspecified                                                | Mood disorders |
| F32    | 296 | Major depressive disorder, single episode                                    | Mood disorders |
| F32    | 296 | Major depressive disorder, single episode                                    | Mood disorders |
| F32.0  | 296 | Major depressive disorder, single episode, mild                              | Mood disorders |
| F32.0  | 296 | Major depressive disorder, single episode, mild                              | Mood disorders |
| F32.1  | 296 | Major depressive disorder, single episode, moderate                          | Mood disorders |
| F32.1  | 296 | Major depressive disorder, single episode, moderate                          | Mood disorders |
| F32.2  | 296 | Major depressive disorder, single episode, severe without psychotic features | Mood disorders |
| F32.2  | 296 | Major depressive disorder, single episode, severe without psychotic features | Mood disorders |
| F32.3  | 296 | Major depressive disorder, single episode, severe with psychotic features    | Mood disorders |
| F32.3  | 296 | Major depressive disorder, single episode, severe with psychotic features    | Mood disorders |
| F32.4  | 296 | Major depressive disorder, single episode, in partial remission              | Mood disorders |
| F32.4  | 296 | Major depressive disorder, single episode, in partial remission              | Mood disorders |
| F32.5  | 296 | Major depressive disorder, single episode, in full remission                 | Mood disorders |
| F32.5  | 296 | Major depressive disorder, single episode, in full remission                 | Mood disorders |
| F32.8  | 296 | Other depressive episodes                                                    | Mood disorders |
| F32.8  | 296 | Other depressive episodes                                                    | Mood disorders |
| F32.89 | 296 | Other specified depressive episodes                                          | Mood disorders |
| F32.89 | 296 | Other specified depressive episodes                                          | Mood disorders |
| F32.9  | 296 | Major depressive disorder, single episode, unspecified                       | Mood disorders |
| F32.9  | 296 | Major depressive disorder, single episode, unspecified                       | Mood disorders |
| F33    | 296 | Major depressive disorder, recurrent                                         | Mood disorders |
| F33    | 296 | Major depressive disorder, recurrent                                         | Mood disorders |
| F33.0  | 296 | Major depressive disorder, recurrent, mild                                   | Mood disorders |
| F33.0  | 296 | Major depressive disorder, recurrent, mild                                   | Mood disorders |
| F33.1  | 296 | Major depressive disorder, recurrent, moderate                               | Mood disorders |
| F33.1  | 296 | Major depressive disorder, recurrent, moderate                               | Mood disorders |
| F33.2  | 296 | Major depressive disorder, recurrent severe without psychotic features       | Mood disorders |
| F33.2  | 296 | Major depressive disorder, recurrent severe without psychotic features       | Mood disorders |
| F33.3  | 296 | Major depressive disorder, recurrent, severe with psychotic symptoms         | Mood disorders |
| F33.3  | 296 | Major depressive disorder, recurrent, severe with psychotic symptoms         | Mood disorders |
| F33.40 | 296 | Major depressive disorder, recurrent, in remission, unspecified              | Mood disorders |
| F33.40 | 296 | Major depressive disorder, recurrent, in remission, unspecified              | Mood disorders |
| F33.41 | 296 | Major depressive disorder, recurrent, in partial remission                   | Mood disorders |
| F33.41 | 296 | Major depressive disorder, recurrent, in partial remission                   | Mood disorders |
| F33.42 | 296 | Major depressive disorder, recurrent, in full remission                      | Mood disorders |

|        |       |                                                                                     |                |
|--------|-------|-------------------------------------------------------------------------------------|----------------|
| F33.42 | 296   | Major depressive disorder, recurrent, in full remission                             | Mood disorders |
| F33.8  | 296   | Other recurrent depressive disorders                                                | Mood disorders |
| F33.8  | 296   | Other recurrent depressive disorders                                                | Mood disorders |
| F33.9  | 296   | Major depressive disorder, recurrent, unspecified                                   | Mood disorders |
| F33.9  | 296   | Major depressive disorder, recurrent, unspecified                                   | Mood disorders |
| F34.8  | 296   | Other persistent mood [affective] disorders                                         | Mood disorders |
| F34.8  | 296   | Other persistent mood [affective] disorders                                         | Mood disorders |
| F34.9  | 296   | Persistent mood [affective] disorder, unspecified                                   | Mood disorders |
| F34.9  | 296   | Persistent mood [affective] disorder, unspecified                                   | Mood disorders |
| F39    | 296   | Unspecified mood [affective] disorder                                               | Mood disorders |
| F39    | 296   | Unspecified mood [affective] disorder                                               | Mood disorders |
| F31    | 296.1 | Bipolar disorder                                                                    | Bipolar        |
| F31    | 296.1 | Bipolar disorder                                                                    | Bipolar        |
| F31.0  | 296.1 | Bipolar disorder, current episode hypomanic                                         | Bipolar        |
| F31.0  | 296.1 | Bipolar disorder, current episode hypomanic                                         | Bipolar        |
| F31.10 | 296.1 | Bipolar disorder, current episode manic without psychotic features, unspecified     | Bipolar        |
| F31.10 | 296.1 | Bipolar disorder, current episode manic without psychotic features, unspecified     | Bipolar        |
| F31.11 | 296.1 | Bipolar disorder, current episode manic without psychotic features, mild            | Bipolar        |
| F31.11 | 296.1 | Bipolar disorder, current episode manic without psychotic features, mild            | Bipolar        |
| F31.12 | 296.1 | Bipolar disorder, current episode manic without psychotic features, moderate        | Bipolar        |
| F31.12 | 296.1 | Bipolar disorder, current episode manic without psychotic features, moderate        | Bipolar        |
| F31.13 | 296.1 | Bipolar disorder, current episode manic without psychotic features, severe          | Bipolar        |
| F31.13 | 296.1 | Bipolar disorder, current episode manic without psychotic features, severe          | Bipolar        |
| F31.2  | 296.1 | Bipolar disorder, current episode manic severe with psychotic features              | Bipolar        |
| F31.2  | 296.1 | Bipolar disorder, current episode manic severe with psychotic features              | Bipolar        |
| F31.30 | 296.1 | Bipolar disorder, current episode depressed, mild or moderate severity, unspecified | Bipolar        |
| F31.30 | 296.1 | Bipolar disorder, current episode depressed, mild or moderate severity, unspecified | Bipolar        |
| F31.31 | 296.1 | Bipolar disorder, current episode depressed, mild                                   | Bipolar        |
| F31.31 | 296.1 | Bipolar disorder, current episode depressed, mild                                   | Bipolar        |
| F31.32 | 296.1 | Bipolar disorder, current episode depressed, moderate                               | Bipolar        |
| F31.32 | 296.1 | Bipolar disorder, current episode depressed, moderate                               | Bipolar        |
| F31.4  | 296.1 | Bipolar disorder, current episode depressed, severe, without psychotic features     | Bipolar        |
| F31.4  | 296.1 | Bipolar disorder, current episode depressed, severe, without psychotic features     | Bipolar        |
| F31.5  | 296.1 | Bipolar disorder, current episode depressed, severe, with psychotic features        | Bipolar        |
| F31.5  | 296.1 | Bipolar disorder, current episode depressed, severe, with psychotic features        | Bipolar        |
| F31.60 | 296.1 | Bipolar disorder, current episode mixed, unspecified                                | Bipolar        |
| F31.60 | 296.1 | Bipolar disorder, current episode mixed, unspecified                                | Bipolar        |
| F31.61 | 296.1 | Bipolar disorder, current episode mixed, mild                                       | Bipolar        |
| F31.61 | 296.1 | Bipolar disorder, current episode mixed, mild                                       | Bipolar        |

|        |       |                                                                             |            |
|--------|-------|-----------------------------------------------------------------------------|------------|
| F31.62 | 296.1 | Bipolar disorder, current episode mixed, moderate                           | Bipolar    |
| F31.62 | 296.1 | Bipolar disorder, current episode mixed, moderate                           | Bipolar    |
| F31.63 | 296.1 | Bipolar disorder, current episode mixed, severe, without psychotic features | Bipolar    |
| F31.63 | 296.1 | Bipolar disorder, current episode mixed, severe, without psychotic features | Bipolar    |
| F31.64 | 296.1 | Bipolar disorder, current episode mixed, severe, with psychotic features    | Bipolar    |
| F31.64 | 296.1 | Bipolar disorder, current episode mixed, severe, with psychotic features    | Bipolar    |
| F31.70 | 296.1 | Bipolar disorder, currently in remission, most recent episode unspecified   | Bipolar    |
| F31.70 | 296.1 | Bipolar disorder, currently in remission, most recent episode unspecified   | Bipolar    |
| F31.71 | 296.1 | Bipolar disorder, in partial remission, most recent episode hypomanic       | Bipolar    |
| F31.71 | 296.1 | Bipolar disorder, in partial remission, most recent episode hypomanic       | Bipolar    |
| F31.72 | 296.1 | Bipolar disorder, in full remission, most recent episode hypomanic          | Bipolar    |
| F31.72 | 296.1 | Bipolar disorder, in full remission, most recent episode hypomanic          | Bipolar    |
| F31.73 | 296.1 | Bipolar disorder, in partial remission, most recent episode manic           | Bipolar    |
| F31.73 | 296.1 | Bipolar disorder, in partial remission, most recent episode manic           | Bipolar    |
| F31.74 | 296.1 | Bipolar disorder, in full remission, most recent episode manic              | Bipolar    |
| F31.74 | 296.1 | Bipolar disorder, in full remission, most recent episode manic              | Bipolar    |
| F31.75 | 296.1 | Bipolar disorder, in partial remission, most recent episode depressed       | Bipolar    |
| F31.75 | 296.1 | Bipolar disorder, in partial remission, most recent episode depressed       | Bipolar    |
| F31.76 | 296.1 | Bipolar disorder, in full remission, most recent episode depressed          | Bipolar    |
| F31.76 | 296.1 | Bipolar disorder, in full remission, most recent episode depressed          | Bipolar    |
| F31.77 | 296.1 | Bipolar disorder, in partial remission, most recent episode mixed           | Bipolar    |
| F31.77 | 296.1 | Bipolar disorder, in partial remission, most recent episode mixed           | Bipolar    |
| F31.78 | 296.1 | Bipolar disorder, in full remission, most recent episode mixed              | Bipolar    |
| F31.78 | 296.1 | Bipolar disorder, in full remission, most recent episode mixed              | Bipolar    |
| F31.81 | 296.1 | Bipolar II disorder                                                         | Bipolar    |
| F31.81 | 296.1 | Bipolar II disorder                                                         | Bipolar    |
| F31.89 | 296.1 | Other bipolar disorder                                                      | Bipolar    |
| F31.89 | 296.1 | Other bipolar disorder                                                      | Bipolar    |
| F31.9  | 296.1 | Bipolar disorder, unspecified                                               | Bipolar    |
| F31.9  | 296.1 | Bipolar disorder, unspecified                                               | Bipolar    |
| F32.8  | 296.1 | Other depressive episodes                                                   | Bipolar    |
| F32.8  | 296.1 | Other depressive episodes                                                   | Bipolar    |
| F32.89 | 296.1 | Other specified depressive episodes                                         | Bipolar    |
| F32.89 | 296.1 | Other specified depressive episodes                                         | Bipolar    |
| F32    | 296.2 | Major depressive disorder, single episode                                   | Depression |
| F32    | 296.2 | Major depressive disorder, single episode                                   | Depression |
| F32.0  | 296.2 | Major depressive disorder, single episode, mild                             | Depression |
| F32.0  | 296.2 | Major depressive disorder, single episode, mild                             | Depression |
| F32.1  | 296.2 | Major depressive disorder, single episode, moderate                         | Depression |

|        |            |                                                                              |                           |
|--------|------------|------------------------------------------------------------------------------|---------------------------|
| F32.1  | 296.2      | Major depressive disorder, single episode, moderate                          | Depression                |
| F32.2  | 296.2      | Major depressive disorder, single episode, severe without psychotic features | Depression                |
| F32.2  | 296.2      | Major depressive disorder, single episode, severe without psychotic features | Depression                |
| F32.3  | 296.2      | Major depressive disorder, single episode, severe with psychotic features    | Depression                |
| F32.3  | 296.2      | Major depressive disorder, single episode, severe with psychotic features    | Depression                |
| F32.4  | 296.2      | Major depressive disorder, single episode, in partial remission              | Depression                |
| F32.4  | 296.2      | Major depressive disorder, single episode, in partial remission              | Depression                |
| F32.5  | 296.2      | Major depressive disorder, single episode, in full remission                 | Depression                |
| F32.5  | 296.2      | Major depressive disorder, single episode, in full remission                 | Depression                |
| F32.9  | 296.2      | Major depressive disorder, single episode, unspecified                       | Depression                |
| F32.9  | 296.2      | Major depressive disorder, single episode, unspecified                       | Depression                |
| F33    | 296.2      | Major depressive disorder, recurrent                                         | Depression                |
| F33    | 296.2      | Major depressive disorder, recurrent                                         | Depression                |
| F33.0  | 296.2      | Major depressive disorder, recurrent, mild                                   | Depression                |
| F33.0  | 296.2      | Major depressive disorder, recurrent, mild                                   | Depression                |
| F33.1  | 296.2      | Major depressive disorder, recurrent, moderate                               | Depression                |
| F33.1  | 296.2      | Major depressive disorder, recurrent, moderate                               | Depression                |
| F33.2  | 296.2      | Major depressive disorder, recurrent severe without psychotic features       | Depression                |
| F33.2  | 296.2      | Major depressive disorder, recurrent severe without psychotic features       | Depression                |
| F33.3  | 296.2      | Major depressive disorder, recurrent, severe with psychotic symptoms         | Depression                |
| F33.3  | 296.2      | Major depressive disorder, recurrent, severe with psychotic symptoms         | Depression                |
| F33.40 | 296.2      | Major depressive disorder, recurrent, in remission, unspecified              | Depression                |
| F33.40 | 296.2      | Major depressive disorder, recurrent, in remission, unspecified              | Depression                |
| F33.41 | 296.2      | Major depressive disorder, recurrent, in partial remission                   | Depression                |
| F33.41 | 296.2      | Major depressive disorder, recurrent, in partial remission                   | Depression                |
| F33.42 | 296.2      | Major depressive disorder, recurrent, in full remission                      | Depression                |
| F33.42 | 296.2      | Major depressive disorder, recurrent, in full remission                      | Depression                |
| F33.9  | 296.2      | Major depressive disorder, recurrent, unspecified                            | Depression                |
| F33.9  | 296.2      | Major depressive disorder, recurrent, unspecified                            | Depression                |
| F32    | 296.2<br>2 | Major depressive disorder, single episode                                    | Major depressive disorder |
| F32    | 296.2<br>2 | Major depressive disorder, single episode                                    | Major depressive disorder |
| F32.1  | 296.2<br>2 | Major depressive disorder, single episode, moderate                          | Major depressive disorder |
| F32.1  | 296.2<br>2 | Major depressive disorder, single episode, moderate                          | Major depressive disorder |
| F32.2  | 296.2<br>2 | Major depressive disorder, single episode, severe without psychotic features | Major depressive disorder |
| F32.2  | 296.2<br>2 | Major depressive disorder, single episode, severe without psychotic features | Major depressive disorder |
| F32.3  | 296.2<br>2 | Major depressive disorder, single episode, severe with psychotic features    | Major depressive disorder |
| F32.3  | 296.2<br>2 | Major depressive disorder, single episode, severe with psychotic features    | Major depressive disorder |
| F32.4  | 296.2<br>2 | Major depressive disorder, single episode, in partial remission              | Major depressive disorder |

|         |            |                                                                        |                           |
|---------|------------|------------------------------------------------------------------------|---------------------------|
| F32.4   | 296.2<br>2 | Major depressive disorder, single episode, in partial remission        | Major depressive disorder |
| F32.5   | 296.2<br>2 | Major depressive disorder, single episode, in full remission           | Major depressive disorder |
| F32.5   | 296.2<br>2 | Major depressive disorder, single episode, in full remission           | Major depressive disorder |
| F32.9   | 296.2<br>2 | Major depressive disorder, single episode, unspecified                 | Major depressive disorder |
| F32.9   | 296.2<br>2 | Major depressive disorder, single episode, unspecified                 | Major depressive disorder |
| F33     | 296.2<br>2 | Major depressive disorder, recurrent                                   | Major depressive disorder |
| F33     | 296.2<br>2 | Major depressive disorder, recurrent                                   | Major depressive disorder |
| F33.1   | 296.2<br>2 | Major depressive disorder, recurrent, moderate                         | Major depressive disorder |
| F33.1   | 296.2<br>2 | Major depressive disorder, recurrent, moderate                         | Major depressive disorder |
| F33.2   | 296.2<br>2 | Major depressive disorder, recurrent severe without psychotic features | Major depressive disorder |
| F33.2   | 296.2<br>2 | Major depressive disorder, recurrent severe without psychotic features | Major depressive disorder |
| F33.3   | 296.2<br>2 | Major depressive disorder, recurrent, severe with psychotic symptoms   | Major depressive disorder |
| F33.3   | 296.2<br>2 | Major depressive disorder, recurrent, severe with psychotic symptoms   | Major depressive disorder |
| F33.40  | 296.2<br>2 | Major depressive disorder, recurrent, in remission, unspecified        | Major depressive disorder |
| F33.40  | 296.2<br>2 | Major depressive disorder, recurrent, in remission, unspecified        | Major depressive disorder |
| F33.41  | 296.2<br>2 | Major depressive disorder, recurrent, in partial remission             | Major depressive disorder |
| F33.41  | 296.2<br>2 | Major depressive disorder, recurrent, in partial remission             | Major depressive disorder |
| F33.42  | 296.2<br>2 | Major depressive disorder, recurrent, in full remission                | Major depressive disorder |
| F33.42  | 296.2<br>2 | Major depressive disorder, recurrent, in full remission                | Major depressive disorder |
| F33.9   | 296.2<br>2 | Major depressive disorder, recurrent, unspecified                      | Major depressive disorder |
| F33.9   | 296.2<br>2 | Major depressive disorder, recurrent, unspecified                      | Major depressive disorder |
| F34.1   | 300        | Dysthymic disorder                                                     | Anxiety disorders         |
| F34.1   | 300        | Dysthymic disorder                                                     | Anxiety disorders         |
| F40.00  | 300        | Agoraphobia, unspecified                                               | Anxiety disorders         |
| F40.00  | 300        | Agoraphobia, unspecified                                               | Anxiety disorders         |
| F40.01  | 300        | Agoraphobia with panic disorder                                        | Anxiety disorders         |
| F40.01  | 300        | Agoraphobia with panic disorder                                        | Anxiety disorders         |
| F40.02  | 300        | Agoraphobia without panic disorder                                     | Anxiety disorders         |
| F40.02  | 300        | Agoraphobia without panic disorder                                     | Anxiety disorders         |
| F40.10  | 300        | Social phobia, unspecified                                             | Anxiety disorders         |
| F40.10  | 300        | Social phobia, unspecified                                             | Anxiety disorders         |
| F40.11  | 300        | Social phobia, generalized                                             | Anxiety disorders         |
| F40.11  | 300        | Social phobia, generalized                                             | Anxiety disorders         |
| F40.210 | 300        | Arachnophobia                                                          | Anxiety disorders         |
| F40.210 | 300        | Arachnophobia                                                          | Anxiety disorders         |
| F40.218 | 300        | Other animal type phobia                                               | Anxiety disorders         |
| F40.218 | 300        | Other animal type phobia                                               | Anxiety disorders         |

|         |     |                                              |                   |
|---------|-----|----------------------------------------------|-------------------|
| F40.231 | 300 | Fear of injections and transfusions          | Anxiety disorders |
| F40.231 | 300 | Fear of injections and transfusions          | Anxiety disorders |
| F40.232 | 300 | Fear of other medical care                   | Anxiety disorders |
| F40.232 | 300 | Fear of other medical care                   | Anxiety disorders |
| F40.233 | 300 | Fear of injury                               | Anxiety disorders |
| F40.233 | 300 | Fear of injury                               | Anxiety disorders |
| F40.240 | 300 | Claustrophobia                               | Anxiety disorders |
| F40.240 | 300 | Claustrophobia                               | Anxiety disorders |
| F40.241 | 300 | Acrophobia                                   | Anxiety disorders |
| F40.241 | 300 | Acrophobia                                   | Anxiety disorders |
| F40.242 | 300 | Fear of bridges                              | Anxiety disorders |
| F40.242 | 300 | Fear of bridges                              | Anxiety disorders |
| F40.243 | 300 | Fear of flying                               | Anxiety disorders |
| F40.243 | 300 | Fear of flying                               | Anxiety disorders |
| F40.248 | 300 | Other situational type phobia                | Anxiety disorders |
| F40.248 | 300 | Other situational type phobia                | Anxiety disorders |
| F40.291 | 300 | Gynephobia                                   | Anxiety disorders |
| F40.291 | 300 | Gynephobia                                   | Anxiety disorders |
| F40.298 | 300 | Other specified phobia                       | Anxiety disorders |
| F40.298 | 300 | Other specified phobia                       | Anxiety disorders |
| F40.8   | 300 | Other phobic anxiety disorders               | Anxiety disorders |
| F40.8   | 300 | Other phobic anxiety disorders               | Anxiety disorders |
| F40.9   | 300 | Phobic anxiety disorder, unspecified         | Anxiety disorders |
| F40.9   | 300 | Phobic anxiety disorder, unspecified         | Anxiety disorders |
| F41.0   | 300 | Panic disorder [episodic paroxysmal anxiety] | Anxiety disorders |
| F41.0   | 300 | Panic disorder [episodic paroxysmal anxiety] | Anxiety disorders |
| F41.1   | 300 | Generalized anxiety disorder                 | Anxiety disorders |
| F41.1   | 300 | Generalized anxiety disorder                 | Anxiety disorders |
| F41.3   | 300 | Other mixed anxiety disorders                | Anxiety disorders |
| F41.3   | 300 | Other mixed anxiety disorders                | Anxiety disorders |
| F41.8   | 300 | Other specified anxiety disorders            | Anxiety disorders |
| F41.8   | 300 | Other specified anxiety disorders            | Anxiety disorders |
| F41.9   | 300 | Anxiety disorder, unspecified                | Anxiety disorders |
| F41.9   | 300 | Anxiety disorder, unspecified                | Anxiety disorders |
| F42     | 300 | Obsessive-compulsive disorder                | Anxiety disorders |
| F42     | 300 | Obsessive-compulsive disorder                | Anxiety disorders |
| F42.8   | 300 | Other obsessive-compulsive disorder          | Anxiety disorders |
| F42.8   | 300 | Other obsessive-compulsive disorder          | Anxiety disorders |
| F42.9   | 300 | Obsessive-compulsive disorder, unspecified   | Anxiety disorders |

|         |       |                                             |                   |
|---------|-------|---------------------------------------------|-------------------|
| F42.9   | 300   | Obsessive-compulsive disorder, unspecified  | Anxiety disorders |
| F43.1   | 300   | Post-traumatic stress disorder (PTSD)       | Anxiety disorders |
| F43.1   | 300   | Post-traumatic stress disorder (PTSD)       | Anxiety disorders |
| F43.10  | 300   | Post-traumatic stress disorder, unspecified | Anxiety disorders |
| F43.10  | 300   | Post-traumatic stress disorder, unspecified | Anxiety disorders |
| F43.11  | 300   | Post-traumatic stress disorder, acute       | Anxiety disorders |
| F43.11  | 300   | Post-traumatic stress disorder, acute       | Anxiety disorders |
| F43.12  | 300   | Post-traumatic stress disorder, chronic     | Anxiety disorders |
| F43.12  | 300   | Post-traumatic stress disorder, chronic     | Anxiety disorders |
| F40.00  | 300.1 | Agoraphobia, unspecified                    | Anxiety disorder  |
| F40.00  | 300.1 | Agoraphobia, unspecified                    | Anxiety disorder  |
| F40.01  | 300.1 | Agoraphobia with panic disorder             | Anxiety disorder  |
| F40.01  | 300.1 | Agoraphobia with panic disorder             | Anxiety disorder  |
| F40.02  | 300.1 | Agoraphobia without panic disorder          | Anxiety disorder  |
| F40.02  | 300.1 | Agoraphobia without panic disorder          | Anxiety disorder  |
| F40.10  | 300.1 | Social phobia, unspecified                  | Anxiety disorder  |
| F40.10  | 300.1 | Social phobia, unspecified                  | Anxiety disorder  |
| F40.11  | 300.1 | Social phobia, generalized                  | Anxiety disorder  |
| F40.11  | 300.1 | Social phobia, generalized                  | Anxiety disorder  |
| F40.210 | 300.1 | Arachnophobia                               | Anxiety disorder  |
| F40.210 | 300.1 | Arachnophobia                               | Anxiety disorder  |
| F40.218 | 300.1 | Other animal type phobia                    | Anxiety disorder  |
| F40.218 | 300.1 | Other animal type phobia                    | Anxiety disorder  |
| F40.231 | 300.1 | Fear of injections and transfusions         | Anxiety disorder  |
| F40.231 | 300.1 | Fear of injections and transfusions         | Anxiety disorder  |
| F40.232 | 300.1 | Fear of other medical care                  | Anxiety disorder  |
| F40.232 | 300.1 | Fear of other medical care                  | Anxiety disorder  |
| F40.233 | 300.1 | Fear of injury                              | Anxiety disorder  |
| F40.233 | 300.1 | Fear of injury                              | Anxiety disorder  |
| F40.240 | 300.1 | Claustrophobia                              | Anxiety disorder  |
| F40.240 | 300.1 | Claustrophobia                              | Anxiety disorder  |
| F40.241 | 300.1 | Acrophobia                                  | Anxiety disorder  |
| F40.241 | 300.1 | Acrophobia                                  | Anxiety disorder  |
| F40.242 | 300.1 | Fear of bridges                             | Anxiety disorder  |
| F40.242 | 300.1 | Fear of bridges                             | Anxiety disorder  |
| F40.243 | 300.1 | Fear of flying                              | Anxiety disorder  |
| F40.243 | 300.1 | Fear of flying                              | Anxiety disorder  |
| F40.248 | 300.1 | Other situational type phobia               | Anxiety disorder  |
| F40.248 | 300.1 | Other situational type phobia               | Anxiety disorder  |

|         |            |                                              |                                                   |
|---------|------------|----------------------------------------------|---------------------------------------------------|
| F40.291 | 300.1      | Gynephobia                                   | Anxiety disorder                                  |
| F40.291 | 300.1      | Gynephobia                                   | Anxiety disorder                                  |
| F40.298 | 300.1      | Other specified phobia                       | Anxiety disorder                                  |
| F40.298 | 300.1      | Other specified phobia                       | Anxiety disorder                                  |
| F40.8   | 300.1      | Other phobic anxiety disorders               | Anxiety disorder                                  |
| F40.8   | 300.1      | Other phobic anxiety disorders               | Anxiety disorder                                  |
| F40.9   | 300.1      | Phobic anxiety disorder, unspecified         | Anxiety disorder                                  |
| F40.9   | 300.1      | Phobic anxiety disorder, unspecified         | Anxiety disorder                                  |
| F41.0   | 300.1      | Panic disorder [episodic paroxysmal anxiety] | Anxiety disorder                                  |
| F41.0   | 300.1      | Panic disorder [episodic paroxysmal anxiety] | Anxiety disorder                                  |
| F41.1   | 300.1      | Generalized anxiety disorder                 | Anxiety disorder                                  |
| F41.1   | 300.1      | Generalized anxiety disorder                 | Anxiety disorder                                  |
| F41.3   | 300.1      | Other mixed anxiety disorders                | Anxiety disorder                                  |
| F41.3   | 300.1      | Other mixed anxiety disorders                | Anxiety disorder                                  |
| F41.8   | 300.1      | Other specified anxiety disorders            | Anxiety disorder                                  |
| F41.8   | 300.1      | Other specified anxiety disorders            | Anxiety disorder                                  |
| F41.9   | 300.1      | Anxiety disorder, unspecified                | Anxiety disorder                                  |
| F41.9   | 300.1      | Anxiety disorder, unspecified                | Anxiety disorder                                  |
| F41.1   | 300.1<br>1 | Generalized anxiety disorder                 | Generalized anxiety disorder                      |
| F41.1   | 300.1<br>1 | Generalized anxiety disorder                 | Generalized anxiety disorder                      |
| F40.00  | 300.1<br>2 | Agoraphobia, unspecified                     | Agoraphobia, social phobia,<br>and panic disorder |
| F40.00  | 300.1<br>2 | Agoraphobia, unspecified                     | Agoraphobia, social phobia,<br>and panic disorder |
| F40.01  | 300.1<br>2 | Agoraphobia with panic disorder              | Agoraphobia, social phobia,<br>and panic disorder |
| F40.01  | 300.1<br>2 | Agoraphobia with panic disorder              | Agoraphobia, social phobia,<br>and panic disorder |
| F40.02  | 300.1<br>2 | Agoraphobia without panic disorder           | Agoraphobia, social phobia,<br>and panic disorder |
| F40.02  | 300.1<br>2 | Agoraphobia without panic disorder           | Agoraphobia, social phobia,<br>and panic disorder |
| F40.10  | 300.1<br>2 | Social phobia, unspecified                   | Agoraphobia, social phobia,<br>and panic disorder |
| F40.10  | 300.1<br>2 | Social phobia, unspecified                   | Agoraphobia, social phobia,<br>and panic disorder |
| F40.11  | 300.1<br>2 | Social phobia, generalized                   | Agoraphobia, social phobia,<br>and panic disorder |
| F40.11  | 300.1<br>2 | Social phobia, generalized                   | Agoraphobia, social phobia,<br>and panic disorder |
| F41.0   | 300.1<br>2 | Panic disorder [episodic paroxysmal anxiety] | Agoraphobia, social phobia,<br>and panic disorder |
| F41.0   | 300.1<br>2 | Panic disorder [episodic paroxysmal anxiety] | Agoraphobia, social phobia,<br>and panic disorder |
| F40.210 | 300.1<br>3 | Arachnophobia                                | Phobia                                            |
| F40.210 | 300.1<br>3 | Arachnophobia                                | Phobia                                            |
| F40.218 | 300.1<br>3 | Other animal type phobia                     | Phobia                                            |
| F40.218 | 300.1<br>3 | Other animal type phobia                     | Phobia                                            |
| F40.231 | 300.1<br>3 | Fear of injections and transfusions          | Phobia                                            |



|         |            |                                             |                                |
|---------|------------|---------------------------------------------|--------------------------------|
| F40.231 | 300.1<br>3 | Fear of injections and transfusions         | Phobia                         |
| F40.232 | 300.1<br>3 | Fear of other medical care                  | Phobia                         |
| F40.232 | 300.1<br>3 | Fear of other medical care                  | Phobia                         |
| F40.233 | 300.1<br>3 | Fear of injury                              | Phobia                         |
| F40.233 | 300.1<br>3 | Fear of injury                              | Phobia                         |
| F40.240 | 300.1<br>3 | Claustrophobia                              | Phobia                         |
| F40.240 | 300.1<br>3 | Claustrophobia                              | Phobia                         |
| F40.241 | 300.1<br>3 | Acrophobia                                  | Phobia                         |
| F40.241 | 300.1<br>3 | Acrophobia                                  | Phobia                         |
| F40.242 | 300.1<br>3 | Fear of bridges                             | Phobia                         |
| F40.242 | 300.1<br>3 | Fear of bridges                             | Phobia                         |
| F40.243 | 300.1<br>3 | Fear of flying                              | Phobia                         |
| F40.243 | 300.1<br>3 | Fear of flying                              | Phobia                         |
| F40.248 | 300.1<br>3 | Other situational type phobia               | Phobia                         |
| F40.248 | 300.1<br>3 | Other situational type phobia               | Phobia                         |
| F40.291 | 300.1<br>3 | Gynephobia                                  | Phobia                         |
| F40.291 | 300.1<br>3 | Gynephobia                                  | Phobia                         |
| F40.298 | 300.1<br>3 | Other specified phobia                      | Phobia                         |
| F40.298 | 300.1<br>3 | Other specified phobia                      | Phobia                         |
| F40.8   | 300.1<br>3 | Other phobic anxiety disorders              | Phobia                         |
| F40.8   | 300.1<br>3 | Other phobic anxiety disorders              | Phobia                         |
| F40.9   | 300.1<br>3 | Phobic anxiety disorder, unspecified        | Phobia                         |
| F40.9   | 300.1<br>3 | Phobic anxiety disorder, unspecified        | Phobia                         |
| F42     | 300.3      | Obsessive-compulsive disorder               | Obsessive-compulsive disorders |
| F42     | 300.3      | Obsessive-compulsive disorder               | Obsessive-compulsive disorders |
| F42.8   | 300.3      | Other obsessive-compulsive disorder         | Obsessive-compulsive disorders |
| F42.8   | 300.3      | Other obsessive-compulsive disorder         | Obsessive-compulsive disorders |
| F42.9   | 300.3      | Obsessive-compulsive disorder, unspecified  | Obsessive-compulsive disorders |
| F42.9   | 300.3      | Obsessive-compulsive disorder, unspecified  | Obsessive-compulsive disorders |
| F34.1   | 300.4      | Dysthymic disorder                          | Dysthymic disorder             |
| F34.1   | 300.4      | Dysthymic disorder                          | Dysthymic disorder             |
| F43.1   | 300.9      | Post-traumatic stress disorder (PTSD)       | Posttraumatic stress disorder  |
| F43.1   | 300.9      | Post-traumatic stress disorder (PTSD)       | Posttraumatic stress disorder  |
| F43.10  | 300.9      | Post-traumatic stress disorder, unspecified | Posttraumatic stress disorder  |
| F43.10  | 300.9      | Post-traumatic stress disorder, unspecified | Posttraumatic stress disorder  |
| F43.11  | 300.9      | Post-traumatic stress disorder, acute       | Posttraumatic stress disorder  |
| F43.11  | 300.9      | Post-traumatic stress disorder, acute       | Posttraumatic stress disorder  |

|        |       |                                           |                                            |
|--------|-------|-------------------------------------------|--------------------------------------------|
| F43.12 | 300.9 | Post-traumatic stress disorder, chronic   | Posttraumatic stress disorder              |
| F43.12 | 300.9 | Post-traumatic stress disorder, chronic   | Posttraumatic stress disorder              |
| F34.0  | 301   | Cyclothymic disorder                      | Personality disorders                      |
| F34.0  | 301   | Cyclothymic disorder                      | Personality disorders                      |
| F60.0  | 301   | Paranoid personality disorder             | Personality disorders                      |
| F60.0  | 301   | Paranoid personality disorder             | Personality disorders                      |
| F60.1  | 301   | Schizoid personality disorder             | Personality disorders                      |
| F60.1  | 301   | Schizoid personality disorder             | Personality disorders                      |
| F60.2  | 301   | Antisocial personality disorder           | Personality disorders                      |
| F60.2  | 301   | Antisocial personality disorder           | Personality disorders                      |
| F60.3  | 301   | Borderline personality disorder           | Personality disorders                      |
| F60.3  | 301   | Borderline personality disorder           | Personality disorders                      |
| F60.4  | 301   | Histrionic personality disorder           | Personality disorders                      |
| F60.4  | 301   | Histrionic personality disorder           | Personality disorders                      |
| F60.5  | 301   | Obsessive-compulsive personality disorder | Personality disorders                      |
| F60.5  | 301   | Obsessive-compulsive personality disorder | Personality disorders                      |
| F60.6  | 301   | Avoidant personality disorder             | Personality disorders                      |
| F60.6  | 301   | Avoidant personality disorder             | Personality disorders                      |
| F60.7  | 301   | Dependent personality disorder            | Personality disorders                      |
| F60.7  | 301   | Dependent personality disorder            | Personality disorders                      |
| F60.81 | 301   | Narcissistic personality disorder         | Personality disorders                      |
| F60.81 | 301   | Narcissistic personality disorder         | Personality disorders                      |
| F60.89 | 301   | Other specific personality disorders      | Personality disorders                      |
| F60.89 | 301   | Other specific personality disorders      | Personality disorders                      |
| F60.9  | 301   | Personality disorder, unspecified         | Personality disorders                      |
| F60.9  | 301   | Personality disorder, unspecified         | Personality disorders                      |
| F60.1  | 301.1 | Schizoid personality disorder             | Schizoid personality disorder              |
| F60.1  | 301.1 | Schizoid personality disorder             | Schizoid personality disorder              |
| F60.5  | 301.1 | Obsessive-compulsive personality disorder | Schizoid personality disorder              |
| F60.5  | 301.1 | Obsessive-compulsive personality disorder | Schizoid personality disorder              |
| F60.2  | 301.2 | Antisocial personality disorder           | Antisocial/borderline personality disorder |
| F60.2  | 301.2 | Antisocial personality disorder           | Antisocial/borderline personality disorder |
| F60.3  | 301.2 | Borderline personality disorder           | Antisocial/borderline personality disorder |
| F60.3  | 301.2 | Borderline personality disorder           | Antisocial/borderline personality disorder |
| F43.20 | 304   | Adjustment disorder, unspecified          | Adjustment reaction                        |
| F43.20 | 304   | Adjustment disorder, unspecified          | Adjustment reaction                        |
| F43.21 | 304   | Adjustment disorder with depressed mood   | Adjustment reaction                        |
| F43.21 | 304   | Adjustment disorder with depressed mood   | Adjustment reaction                        |

|         |            |                                                                          |                                          |
|---------|------------|--------------------------------------------------------------------------|------------------------------------------|
| F43.22  | 304        | Adjustment disorder with anxiety                                         | Adjustment reaction                      |
| F43.22  | 304        | Adjustment disorder with anxiety                                         | Adjustment reaction                      |
| F43.23  | 304        | Adjustment disorder with mixed anxiety and depressed mood                | Adjustment reaction                      |
| F43.23  | 304        | Adjustment disorder with mixed anxiety and depressed mood                | Adjustment reaction                      |
| F43.24  | 304        | Adjustment disorder with disturbance of conduct                          | Adjustment reaction                      |
| F43.25  | 304        | Adjustment disorder with mixed disturbance of emotions and conduct       | Adjustment reaction                      |
| F43.29  | 304        | Adjustment disorder with other symptoms                                  | Adjustment reaction                      |
| F50.00  | 305.2      | Anorexia nervosa, unspecified                                            | Eating disorder                          |
| F50.01  | 305.2      | Anorexia nervosa, restricting type                                       | Eating disorder                          |
| F50.02  | 305.2      | Anorexia nervosa, binge eating/purging type                              | Eating disorder                          |
| F50.2   | 305.2      | Bulimia nervosa                                                          | Eating disorder                          |
| F50.8   | 305.2      | Other eating disorders                                                   | Eating disorder                          |
| F50.89  | 305.2      | Other specified eating disorder                                          | Eating disorder                          |
| F50.9   | 305.2      | Eating disorder, unspecified                                             | Eating disorder                          |
| F50.00  | 305.2<br>1 | Anorexia nervosa, unspecified                                            | Anorexia nervosa                         |
| F50.01  | 305.2<br>1 | Anorexia nervosa, restricting type                                       | Anorexia nervosa                         |
| F50.02  | 305.2<br>1 | Anorexia nervosa, binge eating/purging type                              | Anorexia nervosa                         |
| F91.1   | 312        | Conduct disorder, childhood-onset type                                   | Conduct disorders                        |
| F91.2   | 312        | Conduct disorder, adolescent-onset type                                  | Conduct disorders                        |
| F91.3   | 312        | Oppositional defiant disorder                                            | Conduct disorders                        |
| F91.8   | 312        | Other conduct disorders                                                  | Conduct disorders                        |
| F91.9   | 312        | Conduct disorder, unspecified                                            | Conduct disorders                        |
| F90.0   | 313        | Attention-deficit hyperactivity disorder, predominantly inattentive type | Pervasive developmental disorders        |
| F90.1   | 313        | Attention-deficit hyperactivity disorder, predominantly hyperactive type | Pervasive developmental disorders        |
| F90.2   | 313        | Attention-deficit hyperactivity disorder, combined type                  | Pervasive developmental disorders        |
| F90.8   | 313        | Attention-deficit hyperactivity disorder, other type                     | Pervasive developmental disorders        |
| F90.9   | 313        | Attention-deficit hyperactivity disorder, unspecified type               | Pervasive developmental disorders        |
| F90.0   | 313.1      | Attention-deficit hyperactivity disorder, predominantly inattentive type | Attention deficit hyperactivity disorder |
| F90.1   | 313.1      | Attention-deficit hyperactivity disorder, predominantly hyperactive type | Attention deficit hyperactivity disorder |
| F90.2   | 313.1      | Attention-deficit hyperactivity disorder, combined type                  | Attention deficit hyperactivity disorder |
| F90.8   | 313.1      | Attention-deficit hyperactivity disorder, other type                     | Attention deficit hyperactivity disorder |
| F90.9   | 313.1      | Attention-deficit hyperactivity disorder, unspecified type               | Attention deficit hyperactivity disorder |
| F11.1   | 316        | Opioid abuse                                                             | Substance addiction and disorders        |
| F11.10  | 316        | Opioid abuse, uncomplicated                                              | Substance addiction and disorders        |
| F11.120 | 316        | Opioid abuse with intoxication, uncomplicated                            | Substance addiction and disorders        |
| F11.122 | 316        | Opioid abuse with intoxication with perceptual disturbance               | Substance addiction and disorders        |
| F11.129 | 316        | Opioid abuse with intoxication, unspecified                              | Substance addiction and disorders        |

|         |     |                                                                              |                                   |
|---------|-----|------------------------------------------------------------------------------|-----------------------------------|
| F11.14  | 316 | Opioid abuse with opioid-induced mood disorder                               | Substance addiction and disorders |
| F11.151 | 316 | Opioid abuse with opioid-induced psychotic disorder with hallucinations      | Substance addiction and disorders |
| F11.159 | 316 | Opioid abuse with opioid-induced psychotic disorder, unspecified             | Substance addiction and disorders |
| F11.182 | 316 | Opioid abuse with opioid-induced sleep disorder                              | Substance addiction and disorders |
| F11.188 | 316 | Opioid abuse with other opioid-induced disorder                              | Substance addiction and disorders |
| F11.19  | 316 | Opioid abuse with unspecified opioid-induced disorder                        | Substance addiction and disorders |
| F11.2   | 316 | Opioid dependence                                                            | Substance addiction and disorders |
| F11.20  | 316 | Opioid dependence, uncomplicated                                             | Substance addiction and disorders |
| F11.21  | 316 | Opioid dependence, in remission                                              | Substance addiction and disorders |
| F11.220 | 316 | Opioid dependence with intoxication, uncomplicated                           | Substance addiction and disorders |
| F11.221 | 316 | Opioid dependence with intoxication delirium                                 | Substance addiction and disorders |
| F11.222 | 316 | Opioid dependence with intoxication with perceptual disturbance              | Substance addiction and disorders |
| F11.229 | 316 | Opioid dependence with intoxication, unspecified                             | Substance addiction and disorders |
| F11.23  | 316 | Opioid dependence with withdrawal                                            | Substance addiction and disorders |
| F11.24  | 316 | Opioid dependence with opioid-induced mood disorder                          | Substance addiction and disorders |
| F11.250 | 316 | Opioid dependence with opioid-induced psychotic disorder with delusions      | Substance addiction and disorders |
| F11.251 | 316 | Opioid dependence with opioid-induced psychotic disorder with hallucinations | Substance addiction and disorders |
| F11.259 | 316 | Opioid dependence with opioid-induced psychotic disorder, unspecified        | Substance addiction and disorders |
| F11.281 | 316 | Opioid dependence with opioid-induced sexual dysfunction                     | Substance addiction and disorders |
| F11.282 | 316 | Opioid dependence with opioid-induced sleep disorder                         | Substance addiction and disorders |
| F11.288 | 316 | Opioid dependence with other opioid-induced disorder                         | Substance addiction and disorders |
| F11.29  | 316 | Opioid dependence with unspecified opioid-induced disorder                   | Substance addiction and disorders |
| F12.1   | 316 | Cannabis abuse                                                               | Substance addiction and disorders |
| F12.10  | 316 | Cannabis abuse, uncomplicated                                                | Substance addiction and disorders |
| F12.120 | 316 | Cannabis abuse with intoxication, uncomplicated                              | Substance addiction and disorders |
| F12.122 | 316 | Cannabis abuse with intoxication with perceptual disturbance                 | Substance addiction and disorders |
| F12.129 | 316 | Cannabis abuse with intoxication, unspecified                                | Substance addiction and disorders |
| F12.150 | 316 | Cannabis abuse with psychotic disorder with delusions                        | Substance addiction and disorders |
| F12.151 | 316 | Cannabis abuse with psychotic disorder with hallucinations                   | Substance addiction and disorders |
| F12.159 | 316 | Cannabis abuse with psychotic disorder, unspecified                          | Substance addiction and disorders |
| F12.180 | 316 | Cannabis abuse with cannabis-induced anxiety disorder                        | Substance addiction and disorders |
| F12.188 | 316 | Cannabis abuse with other cannabis-induced disorder                          | Substance addiction and disorders |
| F12.19  | 316 | Cannabis abuse with unspecified cannabis-induced disorder                    | Substance addiction and disorders |
| F12.2   | 316 | Cannabis dependence                                                          | Substance addiction and disorders |
| F12.20  | 316 | Cannabis dependence, uncomplicated                                           | Substance addiction and disorders |
| F12.21  | 316 | Cannabis dependence, in remission                                            | Substance addiction and disorders |

|         |     |                                                                                                                              |                                   |
|---------|-----|------------------------------------------------------------------------------------------------------------------------------|-----------------------------------|
| F12.220 | 316 | Cannabis dependence with intoxication, uncomplicated                                                                         | Substance addiction and disorders |
| F12.229 | 316 | Cannabis dependence with intoxication, unspecified                                                                           | Substance addiction and disorders |
| F12.259 | 316 | Cannabis dependence with psychotic disorder, unspecified                                                                     | Substance addiction and disorders |
| F12.280 | 316 | Cannabis dependence with cannabis-induced anxiety disorder                                                                   | Substance addiction and disorders |
| F12.288 | 316 | Cannabis dependence with other cannabis-induced disorder                                                                     | Substance addiction and disorders |
| F12.29  | 316 | Cannabis dependence with unspecified cannabis-induced disorder                                                               | Substance addiction and disorders |
| F13.10  | 316 | Sedative, hypnotic, or anxiolytic abuse, uncomplicated                                                                       | Substance addiction and disorders |
| F13.120 | 316 | Sedative, hypnotic, or anxiolytic abuse with intoxication, uncomplicated                                                     | Substance addiction and disorders |
| F13.129 | 316 | Sedative, hypnotic, or anxiolytic abuse with intoxication, unspecified                                                       | Substance addiction and disorders |
| F13.14  | 316 | Sedative, hypnotic or anxiolytic abuse with sedative, hypnotic, or anxiolytic-induced mood disorder                          | Substance addiction and disorders |
| F13.150 | 316 | Sedative, hypnotic or anxiolytic abuse with sedative, hypnotic, or anxiolytic-induced psychotic disorder with delusions      | Substance addiction and disorders |
| F13.151 | 316 | Sedative, hypnotic or anxiolytic abuse with sedative, hypnotic, or anxiolytic-induced psychotic disorder with hallucinations | Substance addiction and disorders |
| F13.159 | 316 | Sedative, hypnotic or anxiolytic abuse with sedative, hypnotic, or anxiolytic-induced psychotic disorder, unspecified        | Substance addiction and disorders |
| F13.180 | 316 | Sedative, hypnotic or anxiolytic abuse with sedative, hypnotic, or anxiolytic-induced anxiety disorder                       | Substance addiction and disorders |
| F13.188 | 316 | Sedative, hypnotic or anxiolytic abuse with other sedative, hypnotic, or anxiolytic-induced disorder                         | Substance addiction and disorders |
| F13.19  | 316 | Sedative, hypnotic or anxiolytic abuse with unspecified sedative, hypnotic, or anxiolytic-induced disorder                   | Substance addiction and disorders |
| F13.20  | 316 | Sedative, hypnotic, or anxiolytic dependence, uncomplicated                                                                  | Substance addiction and disorders |
| F13.21  | 316 | Sedative, hypnotic, or anxiolytic dependence, in remission                                                                   | Substance addiction and disorders |
| F13.220 | 316 | Sedative, hypnotic, or anxiolytic dependence with intoxication, uncomplicated                                                | Substance addiction and disorders |
| F13.221 | 316 | Sedative, hypnotic, or anxiolytic dependence with intoxication delirium                                                      | Substance addiction and disorders |
| F13.229 | 316 | Sedative, hypnotic, or anxiolytic dependence with intoxication, unspecified                                                  | Substance addiction and disorders |
| F13.230 | 316 | Sedative, hypnotic, or anxiolytic dependence with withdrawal, uncomplicated                                                  | Substance addiction and disorders |
| F13.231 | 316 | Sedative, hypnotic, or anxiolytic dependence with withdrawal delirium                                                        | Substance addiction and disorders |
| F13.232 | 316 | Sedative, hypnotic, or anxiolytic dependence with withdrawal with perceptual disturbance                                     | Substance addiction and disorders |
| F13.239 | 316 | Sedative, hypnotic, or anxiolytic dependence with withdrawal, unspecified                                                    | Substance addiction and disorders |
| F13.24  | 316 | Sedative, hypnotic or anxiolytic dependence with sedative, hypnotic, or anxiolytic-induced mood disorder                     | Substance addiction and disorders |
| F13.280 | 316 | Sedative, hypnotic or anxiolytic dependence with sedative, hypnotic, or anxiolytic-induced anxiety disorder                  | Substance addiction and disorders |
| F13.282 | 316 | Sedative, hypnotic or anxiolytic dependence with sedative, hypnotic, or anxiolytic-induced sleep disorder                    | Substance addiction and disorders |
| F13.288 | 316 | Sedative, hypnotic or anxiolytic dependence with other sedative, hypnotic, or anxiolytic-induced disorder                    | Substance addiction and disorders |
| F13.29  | 316 | Sedative, hypnotic or anxiolytic dependence with unspecified sedative, hypnotic, or anxiolytic-induced disorder              | Substance addiction and disorders |
| F14.1   | 316 | Cocaine abuse                                                                                                                | Substance addiction and disorders |
| F14.10  | 316 | Cocaine abuse, uncomplicated                                                                                                 | Substance addiction and disorders |
| F14.120 | 316 | Cocaine abuse with intoxication, uncomplicated                                                                               | Substance addiction and disorders |
| F14.122 | 316 | Cocaine abuse with intoxication with perceptual disturbance                                                                  | Substance addiction and disorders |
| F14.129 | 316 | Cocaine abuse with intoxication, unspecified                                                                                 | Substance addiction and disorders |
| F14.14  | 316 | Cocaine abuse with cocaine-induced mood disorder                                                                             | Substance addiction and disorders |

|         |     |                                                                                     |                                   |
|---------|-----|-------------------------------------------------------------------------------------|-----------------------------------|
| F14.150 | 316 | Cocaine abuse with cocaine-induced psychotic disorder with delusions                | Substance addiction and disorders |
| F14.151 | 316 | Cocaine abuse with cocaine-induced psychotic disorder with hallucinations           | Substance addiction and disorders |
| F14.159 | 316 | Cocaine abuse with cocaine-induced psychotic disorder, unspecified                  | Substance addiction and disorders |
| F14.180 | 316 | Cocaine abuse with cocaine-induced anxiety disorder                                 | Substance addiction and disorders |
| F14.181 | 316 | Cocaine abuse with cocaine-induced sexual dysfunction                               | Substance addiction and disorders |
| F14.182 | 316 | Cocaine abuse with cocaine-induced sleep disorder                                   | Substance addiction and disorders |
| F14.188 | 316 | Cocaine abuse with other cocaine-induced disorder                                   | Substance addiction and disorders |
| F14.19  | 316 | Cocaine abuse with unspecified cocaine-induced disorder                             | Substance addiction and disorders |
| F14.20  | 316 | Cocaine dependence, uncomplicated                                                   | Substance addiction and disorders |
| F14.21  | 316 | Cocaine dependence, in remission                                                    | Substance addiction and disorders |
| F14.220 | 316 | Cocaine dependence with intoxication, uncomplicated                                 | Substance addiction and disorders |
| F14.221 | 316 | Cocaine dependence with intoxication delirium                                       | Substance addiction and disorders |
| F14.222 | 316 | Cocaine dependence with intoxication with perceptual disturbance                    | Substance addiction and disorders |
| F14.229 | 316 | Cocaine dependence with intoxication, unspecified                                   | Substance addiction and disorders |
| F14.23  | 316 | Cocaine dependence with withdrawal                                                  | Substance addiction and disorders |
| F14.24  | 316 | Cocaine dependence with cocaine-induced mood disorder                               | Substance addiction and disorders |
| F14.250 | 316 | Cocaine dependence with cocaine-induced psychotic disorder with delusions           | Substance addiction and disorders |
| F14.251 | 316 | Cocaine dependence with cocaine-induced psychotic disorder with hallucinations      | Substance addiction and disorders |
| F14.259 | 316 | Cocaine dependence with cocaine-induced psychotic disorder, unspecified             | Substance addiction and disorders |
| F14.280 | 316 | Cocaine dependence with cocaine-induced anxiety disorder                            | Substance addiction and disorders |
| F14.282 | 316 | Cocaine dependence with cocaine-induced sleep disorder                              | Substance addiction and disorders |
| F14.288 | 316 | Cocaine dependence with other cocaine-induced disorder                              | Substance addiction and disorders |
| F14.29  | 316 | Cocaine dependence with unspecified cocaine-induced disorder                        | Substance addiction and disorders |
| F15.10  | 316 | Other stimulant abuse, uncomplicated                                                | Substance addiction and disorders |
| F15.120 | 316 | Other stimulant abuse with intoxication, uncomplicated                              | Substance addiction and disorders |
| F15.122 | 316 | Other stimulant abuse with intoxication with perceptual disturbance                 | Substance addiction and disorders |
| F15.129 | 316 | Other stimulant abuse with intoxication, unspecified                                | Substance addiction and disorders |
| F15.14  | 316 | Other stimulant abuse with stimulant-induced mood disorder                          | Substance addiction and disorders |
| F15.150 | 316 | Other stimulant abuse with stimulant-induced psychotic disorder with delusions      | Substance addiction and disorders |
| F15.151 | 316 | Other stimulant abuse with stimulant-induced psychotic disorder with hallucinations | Substance addiction and disorders |
| F15.159 | 316 | Other stimulant abuse with stimulant-induced psychotic disorder, unspecified        | Substance addiction and disorders |
| F15.180 | 316 | Other stimulant abuse with stimulant-induced anxiety disorder                       | Substance addiction and disorders |
| F15.182 | 316 | Other stimulant abuse with stimulant-induced sleep disorder                         | Substance addiction and disorders |
| F15.188 | 316 | Other stimulant abuse with other stimulant-induced disorder                         | Substance addiction and disorders |
| F15.19  | 316 | Other stimulant abuse with unspecified stimulant-induced disorder                   | Substance addiction and disorders |
| F15.20  | 316 | Other stimulant dependence, uncomplicated                                           | Substance addiction and disorders |

|         |     |                                                                                          |                                   |
|---------|-----|------------------------------------------------------------------------------------------|-----------------------------------|
| F15.21  | 316 | Other stimulant dependence, in remission                                                 | Substance addiction and disorders |
| F15.220 | 316 | Other stimulant dependence with intoxication, uncomplicated                              | Substance addiction and disorders |
| F15.221 | 316 | Other stimulant dependence with intoxication delirium                                    | Substance addiction and disorders |
| F15.222 | 316 | Other stimulant dependence with intoxication with perceptual disturbance                 | Substance addiction and disorders |
| F15.229 | 316 | Other stimulant dependence with intoxication, unspecified                                | Substance addiction and disorders |
| F15.23  | 316 | Other stimulant dependence with withdrawal                                               | Substance addiction and disorders |
| F15.24  | 316 | Other stimulant dependence with stimulant-induced mood disorder                          | Substance addiction and disorders |
| F15.250 | 316 | Other stimulant dependence with stimulant-induced psychotic disorder with delusions      | Substance addiction and disorders |
| F15.251 | 316 | Other stimulant dependence with stimulant-induced psychotic disorder with hallucinations | Substance addiction and disorders |
| F15.259 | 316 | Other stimulant dependence with stimulant-induced psychotic disorder, unspecified        | Substance addiction and disorders |
| F15.280 | 316 | Other stimulant dependence with stimulant-induced anxiety disorder                       | Substance addiction and disorders |
| F15.282 | 316 | Other stimulant dependence with stimulant-induced sleep disorder                         | Substance addiction and disorders |
| F15.288 | 316 | Other stimulant dependence with other stimulant-induced disorder                         | Substance addiction and disorders |
| F15.29  | 316 | Other stimulant dependence with unspecified stimulant-induced disorder                   | Substance addiction and disorders |
| F16.1   | 316 | Hallucinogen abuse                                                                       | Substance addiction and disorders |
| F16.10  | 316 | Hallucinogen abuse, uncomplicated                                                        | Substance addiction and disorders |
| F16.120 | 316 | Hallucinogen abuse with intoxication, uncomplicated                                      | Substance addiction and disorders |
| F16.122 | 316 | Hallucinogen abuse with intoxication with perceptual disturbance                         | Substance addiction and disorders |
| F16.129 | 316 | Hallucinogen abuse with intoxication, unspecified                                        | Substance addiction and disorders |
| F16.14  | 316 | Hallucinogen abuse with hallucinogen-induced mood disorder                               | Substance addiction and disorders |
| F16.151 | 316 | Hallucinogen abuse with hallucinogen-induced psychotic disorder with hallucinations      | Substance addiction and disorders |
| F16.183 | 316 | Hallucinogen abuse with hallucinogen persisting perception disorder (flashbacks)         | Substance addiction and disorders |
| F16.20  | 316 | Hallucinogen dependence, uncomplicated                                                   | Substance addiction and disorders |
| F16.21  | 316 | Hallucinogen dependence, in remission                                                    | Substance addiction and disorders |
| F16.229 | 316 | Hallucinogen dependence with intoxication, unspecified                                   | Substance addiction and disorders |
| F16.24  | 316 | Hallucinogen dependence with hallucinogen-induced mood disorder                          | Substance addiction and disorders |
| F16.283 | 316 | Hallucinogen dependence with hallucinogen persisting perception disorder (flashbacks)    | Substance addiction and disorders |
| F16.288 | 316 | Hallucinogen dependence with other hallucinogen-induced disorder                         | Substance addiction and disorders |
| F18.10  | 316 | Inhalant abuse, uncomplicated                                                            | Substance addiction and disorders |
| F18.14  | 316 | Inhalant abuse with inhalant-induced mood disorder                                       | Substance addiction and disorders |
| F18.19  | 316 | Inhalant abuse with unspecified inhalant-induced disorder                                | Substance addiction and disorders |
| F18.20  | 316 | Inhalant dependence, uncomplicated                                                       | Substance addiction and disorders |
| F18.21  | 316 | Inhalant dependence, in remission                                                        | Substance addiction and disorders |
| F18.29  | 316 | Inhalant dependence with unspecified inhalant-induced disorder                           | Substance addiction and disorders |
| F19.10  | 316 | Other psychoactive substance abuse, uncomplicated                                        | Substance addiction and disorders |
| F19.120 | 316 | Other psychoactive substance abuse with intoxication, uncomplicated                      | Substance addiction and disorders |

|         |     |                                                                                                                    |                                   |
|---------|-----|--------------------------------------------------------------------------------------------------------------------|-----------------------------------|
| F19.122 | 316 | Other psychoactive substance abuse with intoxication with perceptual disturbances                                  | Substance addiction and disorders |
| F19.129 | 316 | Other psychoactive substance abuse with intoxication, unspecified                                                  | Substance addiction and disorders |
| F19.14  | 316 | Other psychoactive substance abuse with psychoactive substance-induced mood disorder                               | Substance addiction and disorders |
| F19.150 | 316 | Other psychoactive substance abuse with psychoactive substance-induced psychotic disorder with delusions           | Substance addiction and disorders |
| F19.151 | 316 | Other psychoactive substance abuse with psychoactive substance-induced psychotic disorder with hallucinations      | Substance addiction and disorders |
| F19.159 | 316 | Other psychoactive substance abuse with psychoactive substance-induced psychotic disorder, unspecified             | Substance addiction and disorders |
| F19.180 | 316 | Other psychoactive substance abuse with psychoactive substance-induced anxiety disorder                            | Substance addiction and disorders |
| F19.181 | 316 | Other psychoactive substance abuse with psychoactive substance-induced sexual dysfunction                          | Substance addiction and disorders |
| F19.182 | 316 | Other psychoactive substance abuse with psychoactive substance-induced sleep disorder                              | Substance addiction and disorders |
| F19.188 | 316 | Other psychoactive substance abuse with other psychoactive substance-induced disorder                              | Substance addiction and disorders |
| F19.19  | 316 | Other psychoactive substance abuse with unspecified psychoactive substance-induced disorder                        | Substance addiction and disorders |
| F19.20  | 316 | Other psychoactive substance dependence, uncomplicated                                                             | Substance addiction and disorders |
| F19.21  | 316 | Other psychoactive substance dependence, in remission                                                              | Substance addiction and disorders |
| F19.220 | 316 | Other psychoactive substance dependence with intoxication, uncomplicated                                           | Substance addiction and disorders |
| F19.221 | 316 | Other psychoactive substance dependence with intoxication delirium                                                 | Substance addiction and disorders |
| F19.229 | 316 | Other psychoactive substance dependence with intoxication, unspecified                                             | Substance addiction and disorders |
| F19.230 | 316 | Other psychoactive substance dependence with withdrawal, uncomplicated                                             | Substance addiction and disorders |
| F19.231 | 316 | Other psychoactive substance dependence with withdrawal delirium                                                   | Substance addiction and disorders |
| F19.232 | 316 | Other psychoactive substance dependence with withdrawal with perceptual disturbance                                | Substance addiction and disorders |
| F19.239 | 316 | Other psychoactive substance dependence with withdrawal, unspecified                                               | Substance addiction and disorders |
| F19.24  | 316 | Other psychoactive substance dependence with psychoactive substance-induced mood disorder                          | Substance addiction and disorders |
| F19.250 | 316 | Other psychoactive substance dependence with psychoactive substance-induced psychotic disorder with delusions      | Substance addiction and disorders |
| F19.251 | 316 | Other psychoactive substance dependence with psychoactive substance-induced psychotic disorder with hallucinations | Substance addiction and disorders |
| F19.259 | 316 | Other psychoactive substance dependence with psychoactive substance-induced psychotic disorder, unspecified        | Substance addiction and disorders |
| F19.280 | 316 | Other psychoactive substance dependence with psychoactive substance-induced anxiety disorder                       | Substance addiction and disorders |
| F19.288 | 316 | Other psychoactive substance dependence with other psychoactive substance-induced disorder                         | Substance addiction and disorders |
| F19.29  | 316 | Other psychoactive substance dependence with unspecified psychoactive substance-induced disorder                   | Substance addiction and disorders |
| F10.1   | 317 | Alcohol abuse                                                                                                      | Alcohol-related disorders         |
| F10.10  | 317 | Alcohol abuse, uncomplicated                                                                                       | Alcohol-related disorders         |
| F10.120 | 317 | Alcohol abuse with intoxication, uncomplicated                                                                     | Alcohol-related disorders         |
| F10.129 | 317 | Alcohol abuse with intoxication, unspecified                                                                       | Alcohol-related disorders         |
| F10.14  | 317 | Alcohol abuse with alcohol-induced mood disorder                                                                   | Alcohol-related disorders         |
| F10.150 | 317 | Alcohol abuse with alcohol-induced psychotic disorder with delusions                                               | Alcohol-related disorders         |
| F10.151 | 317 | Alcohol abuse with alcohol-induced psychotic disorder with hallucinations                                          | Alcohol-related disorders         |
| F10.159 | 317 | Alcohol abuse with alcohol-induced psychotic disorder, unspecified                                                 | Alcohol-related disorders         |
| F10.180 | 317 | Alcohol abuse with alcohol-induced anxiety disorder                                                                | Alcohol-related disorders         |
| F10.182 | 317 | Alcohol abuse with alcohol-induced sleep disorder                                                                  | Alcohol-related disorders         |



|         |       |                                                                                |                           |
|---------|-------|--------------------------------------------------------------------------------|---------------------------|
| F10.188 | 317   | Alcohol abuse with other alcohol-induced disorder                              | Alcohol-related disorders |
| F10.19  | 317   | Alcohol abuse with unspecified alcohol-induced disorder                        | Alcohol-related disorders |
| F10.2   | 317   | Alcohol dependence                                                             | Alcohol-related disorders |
| F10.20  | 317   | Alcohol dependence, uncomplicated                                              | Alcohol-related disorders |
| F10.21  | 317   | Alcohol dependence, in remission                                               | Alcohol-related disorders |
| F10.22  | 317   | Alcohol dependence with intoxication                                           | Alcohol-related disorders |
| F10.220 | 317   | Alcohol dependence with intoxication, uncomplicated                            | Alcohol-related disorders |
| F10.229 | 317   | Alcohol dependence with intoxication, unspecified                              | Alcohol-related disorders |
| F10.230 | 317   | Alcohol dependence with withdrawal, uncomplicated                              | Alcohol-related disorders |
| F10.232 | 317   | Alcohol dependence with withdrawal with perceptual disturbance                 | Alcohol-related disorders |
| F10.239 | 317   | Alcohol dependence with withdrawal, unspecified                                | Alcohol-related disorders |
| F10.24  | 317   | Alcohol dependence with alcohol-induced mood disorder                          | Alcohol-related disorders |
| F10.250 | 317   | Alcohol dependence with alcohol-induced psychotic disorder with delusions      | Alcohol-related disorders |
| F10.251 | 317   | Alcohol dependence with alcohol-induced psychotic disorder with hallucinations | Alcohol-related disorders |
| F10.259 | 317   | Alcohol dependence with alcohol-induced psychotic disorder, unspecified        | Alcohol-related disorders |
| F10.26  | 317   | Alcohol dependence with alcohol-induced persisting amnesic disorder            | Alcohol-related disorders |
| F10.27  | 317   | Alcohol dependence with alcohol-induced persisting dementia                    | Alcohol-related disorders |
| F10.280 | 317   | Alcohol dependence with alcohol-induced anxiety disorder                       | Alcohol-related disorders |
| F10.282 | 317   | Alcohol dependence with alcohol-induced sleep disorder                         | Alcohol-related disorders |
| F10.288 | 317   | Alcohol dependence with other alcohol-induced disorder                         | Alcohol-related disorders |
| F10.29  | 317   | Alcohol dependence with unspecified alcohol-induced disorder                   | Alcohol-related disorders |
| F10.1   | 317.1 | Alcohol abuse                                                                  | Alcoholism                |
| F10.10  | 317.1 | Alcohol abuse, uncomplicated                                                   | Alcoholism                |
| F10.120 | 317.1 | Alcohol abuse with intoxication, uncomplicated                                 | Alcoholism                |
| F10.129 | 317.1 | Alcohol abuse with intoxication, unspecified                                   | Alcoholism                |
| F10.151 | 317.1 | Alcohol abuse with alcohol-induced psychotic disorder with hallucinations      | Alcoholism                |
| F10.230 | 317.1 | Alcohol dependence with withdrawal, uncomplicated                              | Alcoholism                |
| F10.232 | 317.1 | Alcohol dependence with withdrawal with perceptual disturbance                 | Alcoholism                |
| F10.239 | 317.1 | Alcohol dependence with withdrawal, unspecified                                | Alcoholism                |
| F10.251 | 317.1 | Alcohol dependence with alcohol-induced psychotic disorder with hallucinations | Alcoholism                |
| F10.26  | 317.1 | Alcohol dependence with alcohol-induced persisting amnesic disorder            | Alcoholism                |
| F10.27  | 317.1 | Alcohol dependence with alcohol-induced persisting dementia                    | Alcoholism                |
| F17.200 | 318   | Nicotine dependence, unspecified, uncomplicated                                | Tobacco use disorder      |
| F17.201 | 318   | Nicotine dependence, unspecified, in remission                                 | Tobacco use disorder      |
| F17.210 | 318   | Nicotine dependence, cigarettes, uncomplicated                                 | Tobacco use disorder      |
| F17.211 | 318   | Nicotine dependence, cigarettes, in remission                                  | Tobacco use disorder      |
| F17.220 | 318   | Nicotine dependence, chewing tobacco, uncomplicated                            | Tobacco use disorder      |
| F17.221 | 318   | Nicotine dependence, chewing tobacco, in remission                             | Tobacco use disorder      |
| F17.290 | 318   | Nicotine dependence, other tobacco product, uncomplicated                      | Tobacco use disorder      |

|         |            |                                                                                     |                                |
|---------|------------|-------------------------------------------------------------------------------------|--------------------------------|
| F17.291 | 318        | Nicotine dependence, other tobacco product, in remission                            | Tobacco use disorder           |
| F51.01  | 327        | Primary insomnia                                                                    | Sleep disorders                |
| F51.02  | 327        | Adjustment insomnia                                                                 | Sleep disorders                |
| F51.03  | 327        | Paradoxical insomnia                                                                | Sleep disorders                |
| F51.04  | 327        | Psychophysiological insomnia                                                        | Sleep disorders                |
| F51.05  | 327        | Insomnia due to other mental disorder                                               | Sleep disorders                |
| F51.09  | 327        | Other insomnia not due to a substance or known physiological condition              | Sleep disorders                |
| F51.11  | 327        | Primary hypersomnia                                                                 | Sleep disorders                |
| F51.12  | 327        | Insufficient sleep syndrome                                                         | Sleep disorders                |
| F51.13  | 327        | Hypersomnia due to other mental disorder                                            | Sleep disorders                |
| F51.19  | 327        | Other hypersomnia not due to a substance or known physiological condition           | Sleep disorders                |
| F51.3   | 327        | Sleepwalking [somnambulism]                                                         | Sleep disorders                |
| F51.4   | 327        | Sleep terrors [night terrors]                                                       | Sleep disorders                |
| F51.5   | 327        | Nightmare disorder                                                                  | Sleep disorders                |
| F51.8   | 327        | Other sleep disorders not due to a substance or known physiological condition       | Sleep disorders                |
| F51.9   | 327        | Sleep disorder not due to a substance or known physiological condition, unspecified | Sleep disorders                |
| F51.11  | 327.1      | Primary hypersomnia                                                                 | Hypersomnia                    |
| F51.12  | 327.1      | Insufficient sleep syndrome                                                         | Hypersomnia                    |
| F51.13  | 327.1      | Hypersomnia due to other mental disorder                                            | Hypersomnia                    |
| F51.19  | 327.1      | Other hypersomnia not due to a substance or known physiological condition           | Hypersomnia                    |
| F51.01  | 327.4      | Primary insomnia                                                                    | Insomnia                       |
| F51.02  | 327.4      | Adjustment insomnia                                                                 | Insomnia                       |
| F51.03  | 327.4      | Paradoxical insomnia                                                                | Insomnia                       |
| F51.04  | 327.4      | Psychophysiological insomnia                                                        | Insomnia                       |
| F51.05  | 327.4      | Insomnia due to other mental disorder                                               | Insomnia                       |
| F51.09  | 327.4      | Other insomnia not due to a substance or known physiological condition              | Insomnia                       |
| F51.01  | 327.4<br>1 | Primary insomnia                                                                    | Organic or persistent insomnia |
| F51.03  | 327.4<br>1 | Paradoxical insomnia                                                                | Organic or persistent insomnia |
| F51.09  | 327.4<br>1 | Other insomnia not due to a substance or known physiological condition              | Organic or persistent insomnia |
| F51.3   | 327.5      | Sleepwalking [somnambulism]                                                         | Parasomnia                     |
| F51.4   | 327.5      | Sleep terrors [night terrors]                                                       | Parasomnia                     |
| F51.5   | 327.5      | Nightmare disorder                                                                  | Parasomnia                     |

**7 ETABLE 2: ALL OF US SAMPLE CHARACTERISTICS (N = 329,038)**

|                                                                                                   | <b>N</b> | <b>%</b> |
|---------------------------------------------------------------------------------------------------|----------|----------|
| Sex assigned at birth: Female                                                                     | 199,658  | 60.68%   |
| Sex assigned at birth Male                                                                        | 125,184  | 38.05%   |
| Sex assigned at birth Not male, not female, no matching concept, prefer not to answer, or skipped | 4,196    | 1.28%    |
| Gender: Woman                                                                                     | 197,961  | 60.16%   |
| Gender: Man                                                                                       | 124,202  | 37.75%   |
| Gender: Not man only, not woman only, no matching concept, prefer not to answer, or skipped       | 6,875    | 2.09%    |
| Sexual orientation: Straight/Heterosexual                                                         | 290,176  | 88.19%   |
| Sexual orientation: All others                                                                    | 38,862   | 11.81%   |
| Age: 18-29                                                                                        | 48,438   | 14.72%   |
| Age: 30-44                                                                                        | 74,353   | 22.60%   |
| Age: 45-64                                                                                        | 128,463  | 39.04%   |
| Age: 65+                                                                                          | 77,784   | 23.64%   |
| Race-ethnicity: Non-Hispanic White                                                                | 172,753  | 52.50%   |
| Race-ethnicity: Black/African American                                                            | 69,084   | 21.00%   |
| Race-ethnicity: Hispanic or Latino/a/x                                                            | 59,348   | 18.04%   |
| Race-ethnicity: Asian                                                                             | 10,747   | 3.27%    |
| Race-ethnicity: Other race-ethnicity                                                              | 5,697    | 1.73%    |
| Race-ethnicity: Multiracial                                                                       | 5,282    | 1.61%    |
| Race-ethnicity: Missing                                                                           | 6,127    | 1.86%    |
| Education: Less than high school                                                                  | 32,178   | 9.78%    |
| Education: High school or equivalent                                                              | 65,214   | 19.82%   |
| Education: Some college                                                                           | 83,518   | 25.38%   |
| Education: College grad/advanced degree                                                           | 140,542  | 42.71%   |
| Education: Missing                                                                                | 7,586    | 2.31%    |
| Household Income: Less than 25k                                                                   | 90,190   | 27.41%   |
| Household Income:25k to 50k                                                                       | 49,190   | 14.95%   |
| Household Income:50k to 75k                                                                       | 33,696   | 10.24%   |
| Household Income:75k 100k                                                                         | 25,867   | 7.86%    |
| Household Income: more than 100k                                                                  | 66,389   | 20.18%   |
| Household Income: Missing                                                                         | 63,706   | 19.36%   |
| Health insurance: Yes                                                                             | 296,627  | 90.15%   |
| Health insurance: No                                                                              | 23,235   | 7.06%    |
| Health insurance: Missing                                                                         | 9,176    | 2.79%    |
| Marital status: Married                                                                           | 137,597  | 41.82%   |
| Marital status: Living With Partner                                                               | 21,906   | 6.66%    |
| Marital status: Divorced                                                                          | 46,496   | 14.13%   |
| Marital status: Never Married                                                                     | 85,479   | 25.98%   |
| Marital status: Separated                                                                         | 11,655   | 3.54%    |
| Marital status: Widowed                                                                           | 16,779   | 5.10%    |
| Marital status: Missing                                                                           | 9,126    | 2.77%    |
| Birthplace: USA                                                                                   | 275,464  | 83.72%   |
| Birthplace: Foreign born                                                                          | 50,237   | 15.27%   |
| Birthplace: Missing                                                                               | 3,337    | 1.01%    |

**8 ETABLE 3: PREVALENCE ACROSS ICD10CM CODE THRESHOLDS**

|                                                | 1+ ICD codes |        | 2+ ICD codes |       | 3+ ICD codes |       | 4+ ICD codes |       |
|------------------------------------------------|--------------|--------|--------------|-------|--------------|-------|--------------|-------|
|                                                | <i>N</i>     | Prev.  | <i>N</i>     | Prev. | <i>N</i>     | Prev. | <i>N</i>     | Prev. |
| Schizophrenia                                  | 3,562        | 1.08%  | 2,653        | 0.81% | 2,218        | 0.67% | 1,941        | 0.59% |
| Bipolar disorder                               | 10,577       | 3.21%  | 7,411        | 2.25% | 5,950        | 1.81% | 5,085        | 1.55% |
| Major depressive disorder                      | 41,493       | 12.61% | 30,544       | 9.28% | 24,695       | 7.51% | 20,770       | 6.31% |
| Adjustment disorder                            | 8,565        | 2.60%  | 4,565        | 1.39% | 2,985        | 0.91% | 2,227        | 0.68% |
| Anxiety disorder (unspecified)                 | 42,309       | 12.86% | 29,989       | 9.11% | 23,669       | 7.19% | 19,677       | 5.98% |
| Alcohol use disorder                           | 9,725        | 2.96%  | 6,201        | 1.88% | 4,678        | 1.42% | 3,821        | 1.16% |
| Nicotine use disorder                          | 25,515       | 7.75%  | 17,272       | 5.25% | 13,169       | 4.00% | 10,529       | 3.20% |
| Dysthymic disorder                             | 2,924        | 0.89%  | 1,661        | 0.50% | 1,201        | 0.37% | 971          | 0.30% |
| Generalized anxiety disorder                   | 12,736       | 3.87%  | 8,320        | 2.53% | 6,467        | 1.97% | 5,341        | 1.62% |
| Post-traumatic stress disorder                 | 7,643        | 2.32%  | 5,525        | 1.68% | 4,532        | 1.38% | 3,929        | 1.19% |
| Attention-deficit hyperactivity disorder       | 3,588        | 1.09%  | 2,475        | 0.75% | 1,950        | 0.59% | 1,619        | 0.49% |
| Social anxiety disorder/agoraphobia            | 5,365        | 1.63%  | 2,934        | 0.89% | 2,057        | 0.63% | 1,572        | 0.48% |
| Eating disorder                                | 1,014        | 0.31%  | 559          | 0.17% | 403          | 0.12% | 310          | 0.09% |
| Phobia                                         | 1,236        | 0.38%  | 406          | 0.12% | 195          | 0.06% | 123          | 0.04% |
| Sleep disorder                                 | 6,591        | 2.00%  | 3,511        | 1.07% | 2,338        | 0.71% | 1,735        | 0.53% |
| Drug use disorder                              | 14,301       | 4.35%  | 9,907        | 3.01% | 7,692        | 2.34% | 6,307        | 1.92% |
| Antisocial/borderline personality disorder     | 1,396        | 0.42%  | 894          | 0.27% | 675          | 0.21% | 571          | 0.17% |
| Other personality disorder                     | 2,327        | 0.71%  | 1,497        | 0.45% | 1,150        | 0.35% | 979          | 0.30% |
| Obsessive compulsive disorder                  | 942          | 0.29%  | 603          | 0.18% | 464          | 0.14% | 383          | 0.12% |
| Anorexia nervosa                               | 148          | 0.04%  | 85           | 0.03% | 61           | 0.02% | 54           | 0.02% |
| Schizotypal personality disorder               | 83           | 0.03%  | 45           | 0.01% | 41           | 0.01% | 35           | 0.01% |
|                                                |              |        |              |       |              |       |              |       |
| Total number of cases (not mutually exclusive) | 202,040      |        | 202,040      |       | 202,040      |       | 87,979       |       |
|                                                |              |        |              |       |              |       |              |       |

*N* = frequency count; Prev. = prevalence

**9 ETABLE 4: ADJUSTED ESTIMATES OF RISK FOR PSYCHIATRIC DISORDERS (3+ ICD CODES)**

|                                  | MOOD |      |   | ANX  |      |   | SUD  |      |   | STRESS |      |   | SCZ  |      |   | PERS |      |   |
|----------------------------------|------|------|---|------|------|---|------|------|---|--------|------|---|------|------|---|------|------|---|
|                                  | OR   | SE   |   | OR   | SE   |   | OR   | SE   |   | OR     | SE   |   | OR   | SE   |   | OR   | SE   |   |
| Female (ref)                     | -    | -    |   | -    | -    |   | -    | -    |   | -      | -    |   | -    | -    |   | -    | -    |   |
| Male                             | 0.83 | 0.07 |   | 0.80 | 0.08 | * | 1.29 | 0.08 | * | 0.85   | 0.13 |   | 0.91 | 0.22 |   | 0.67 | 0.28 |   |
| Neither male nor female selected | 1.02 | 0.06 |   | 1.01 | 0.07 |   | 1.25 | 0.07 | * | 1.00   | 0.11 |   | 0.90 | 0.21 |   | 0.58 | 0.33 |   |
| Woman (ref)                      | -    | -    |   | -    | -    |   | -    | -    |   | -      | -    |   | -    | -    |   | -    | -    |   |
| Man                              | 0.83 | 0.07 | * | 0.81 | 0.08 | * | 1.25 | 0.08 | * | 1.12   | 0.13 |   | 2.01 | 0.22 | * | 1.02 | 0.28 |   |
| Neither man nor women selected   | 0.99 | 0.05 |   | 0.95 | 0.05 |   | 1.11 | 0.06 |   | 1.27   | 0.09 | * | 1.62 | 0.17 | * | 1.53 | 0.18 |   |
| Straight/Heterosexual            | -    | -    |   | -    | -    |   | -    | -    |   | -      | -    |   | -    | -    |   | -    | -    |   |
| Other than straight/heterosexual | 1.37 | 0.02 | * | 1.25 | 0.02 | * | 1.19 | 0.02 | * | 1.44   | 0.03 | * | 1.55 | 0.06 | * | 1.87 | 0.07 | * |
| Age 18-29 (ref)                  | -    | -    |   | -    | -    |   | -    | -    |   | -      | -    |   | -    | -    |   | -    | -    |   |
| Age 30-44                        | 1.68 | 0.02 | * | 1.57 | 0.02 | * | 2.36 | 0.03 | * | 1.65   | 0.05 | * | 2.52 | 0.08 | * | 1.30 | 0.09 | * |
| Age 45-64                        | 2.05 | 0.02 | * | 1.56 | 0.02 | * | 2.58 | 0.03 | * | 1.73   | 0.04 | * | 2.68 | 0.08 | * | 1.09 | 0.09 |   |
| Age 65 and older                 | 1.59 | 0.03 | * | 1.09 | 0.03 | * | 1.29 | 0.04 | * | 1.19   | 0.05 | * | 1.14 | 0.11 |   | 0.42 | 0.13 | * |
| Non-Hispanic White (ref)         | -    | -    |   | -    | -    |   | -    | -    |   | -      | -    |   | -    | -    |   | -    | -    |   |
| Black/African American           | 0.51 | 0.02 | * | 0.39 | 0.02 | * | 0.66 | 0.02 | * | 0.63   | 0.04 | * | 1.26 | 0.06 | * | 0.32 | 0.09 | * |
| Hispanic/Latino/a/x              | 0.72 | 0.02 | * | 0.65 | 0.02 | * | 0.72 | 0.03 | * | 0.73   | 0.04 | * | 1.13 | 0.08 |   | 0.42 | 0.11 | * |
| Asian                            | 0.46 | 0.06 | * | 0.44 | 0.06 | * | 0.40 | 0.11 | * | 0.58   | 0.11 | * | 0.43 | 0.36 |   | 0.31 | 0.34 | * |
| Other race-ethnicity             | 0.94 | 0.05 |   | 0.83 | 0.05 | * | 1.11 | 0.06 |   | 0.99   | 0.09 |   | 1.39 | 0.16 |   | 0.80 | 0.20 |   |
| Multiracial                      | 0.87 | 0.05 | * | 0.80 | 0.05 | * | 0.98 | 0.06 |   | 1.06   | 0.09 |   | 1.84 | 0.15 | * | 0.83 | 0.20 |   |
| No race-ethnicity listed         | 0.84 | 0.04 | * | 0.78 | 0.05 | * | 0.96 | 0.05 |   | 0.86   | 0.09 |   | 1.53 | 0.13 | * | 0.60 | 0.21 |   |
| US born (ref)                    | -    | -    |   | -    | -    |   | -    | -    |   | -      | -    |   | -    | -    |   | -    | -    |   |
| Foreign born                     | 0.66 | 0.02 | * | 0.60 | 0.03 | * | 0.35 | 0.04 | * | 0.62   | 0.05 | * | 0.46 | 0.10 | * | 0.55 | 0.14 | * |
| No birthplace reported           | 0.95 | 0.06 |   | 0.91 | 0.07 |   | 1.09 | 0.06 |   | 0.84   | 0.12 |   | 1.09 | 0.16 |   | 0.84 | 0.29 |   |
| Less than HS (ref)               | -    | -    |   | -    | -    |   | -    | -    |   | -      | -    |   | -    | -    |   | -    | -    |   |
| HS diploma or equivalent         | 0.95 | 0.02 |   | 0.98 | 0.03 |   | 0.83 | 0.02 | * | 1.04   | 0.04 |   | 0.77 | 0.06 | * | 0.88 | 0.10 |   |
| Some college                     | 0.95 | 0.02 |   | 0.99 | 0.03 |   | 0.66 | 0.03 | * | 1.06   | 0.05 |   | 0.58 | 0.07 | * | 1.02 | 0.10 |   |
| College degree or higher         | 0.68 | 0.02 | * | 0.72 | 0.03 | * | 0.27 | 0.03 | * | 0.78   | 0.05 | * | 0.36 | 0.09 | * | 0.54 | 0.12 | * |
| No education reported            | 0.89 | 0.05 |   | 0.84 | 0.05 | * | 0.92 | 0.05 |   | 0.90   | 0.09 |   | 0.82 | 0.11 |   | 0.90 | 0.21 |   |
| Income less than 25K (ref)       | -    | -    |   | -    | -    |   | -    | -    |   | -      | -    |   | -    | -    |   | -    | -    |   |
| Income 25-50K                    | 0.67 | 0.02 | * | 0.74 | 0.02 | * | 0.54 | 0.03 | * | 0.67   | 0.04 | * | 0.36 | 0.09 | * | 0.52 | 0.09 | * |
| Income 50-75K                    | 0.54 | 0.02 | * | 0.61 | 0.03 | * | 0.33 | 0.04 | * | 0.59   | 0.05 | * | 0.17 | 0.16 | * | 0.37 | 0.13 | * |
| Income 75-100K                   | 0.43 | 0.03 | * | 0.53 | 0.03 | * | 0.26 | 0.05 | * | 0.47   | 0.06 | * | 0.10 | 0.27 | * | 0.27 | 0.18 | * |
| Income 100K or more              | 0.31 | 0.03 | * | 0.39 | 0.03 | * | 0.16 | 0.05 | * | 0.34   | 0.05 | * | 0.04 | 0.28 | * | 0.11 | 0.19 | * |
| No income reported               | 0.66 | 0.02 | * | 0.72 | 0.02 | * | 0.71 | 0.02 | * | 0.68   | 0.04 | * | 0.73 | 0.05 | * | 0.67 | 0.08 | * |

|                                                                                                                                                                                                                                                                                                                                                         |      |      |   |      |      |   |      |      |   |      |      |   |      |      |   |      |      |   |
|---------------------------------------------------------------------------------------------------------------------------------------------------------------------------------------------------------------------------------------------------------------------------------------------------------------------------------------------------------|------|------|---|------|------|---|------|------|---|------|------|---|------|------|---|------|------|---|
| Have health insurance (ref)                                                                                                                                                                                                                                                                                                                             | -    | -    |   | -    | -    |   | -    | -    |   | -    | -    |   | -    | -    |   | -    | -    |   |
| No health insurance                                                                                                                                                                                                                                                                                                                                     | 0.41 | 0.03 | * | 0.41 | 0.03 | * | 0.38 | 0.03 | * | 0.58 | 0.06 | * | 0.29 | 0.10 | * | 0.59 | 0.13 | * |
| No health insurance info reported                                                                                                                                                                                                                                                                                                                       | 0.67 | 0.04 | * | 0.69 | 0.05 | * | 0.74 | 0.04 | * | 0.73 | 0.08 | * | 0.69 | 0.11 | * | 0.59 | 0.21 |   |
|                                                                                                                                                                                                                                                                                                                                                         |      |      |   |      |      |   |      |      |   |      |      |   |      |      |   |      |      |   |
| Married (ref)                                                                                                                                                                                                                                                                                                                                           | 1.12 | 0.03 | * | 1.10 | 0.03 | * | 1.84 | 0.04 | * | 1.12 | 0.05 |   | 1.65 | 0.11 | * | 1.27 | 0.14 |   |
| Cohabiting                                                                                                                                                                                                                                                                                                                                              | 1.42 | 0.02 | * | 1.28 | 0.02 | * | 1.95 | 0.03 | * | 1.52 | 0.04 | * | 2.13 | 0.09 | * | 2.20 | 0.10 | * |
| Divorced                                                                                                                                                                                                                                                                                                                                                | 1.24 | 0.02 | * | 1.10 | 0.02 | * | 1.76 | 0.03 | * | 1.16 | 0.04 | * | 2.49 | 0.08 | * | 1.67 | 0.10 | * |
| Never married                                                                                                                                                                                                                                                                                                                                           | 1.40 | 0.03 | * | 1.20 | 0.04 | * | 1.98 | 0.04 | * | 1.44 | 0.06 | * | 2.08 | 0.11 | * | 1.91 | 0.15 | * |
| Separated                                                                                                                                                                                                                                                                                                                                               | 1.33 | 0.03 | * | 1.16 | 0.03 | * | 1.78 | 0.04 | * | 1.36 | 0.06 | * | 1.98 | 0.12 | * | 1.42 | 0.17 |   |
| Widowed                                                                                                                                                                                                                                                                                                                                                 | 1.20 | 0.04 | * | 1.16 | 0.04 | * | 1.82 | 0.05 | * | 1.37 | 0.07 | * | 2.49 | 0.12 | * | 2.36 | 0.16 | * |
| No marital info reported                                                                                                                                                                                                                                                                                                                                | 1.12 | 0.03 | * | 1.10 | 0.03 | * | 1.84 | 0.04 | * | 1.12 | 0.05 |   | 1.65 | 0.11 | * | 1.27 | 0.14 |   |
|                                                                                                                                                                                                                                                                                                                                                         |      |      |   |      |      |   |      |      |   |      |      |   |      |      |   |      |      |   |
| <p>* <math>p &lt; .05/6 = .0083</math><br/> OR = odds ratio; SE = standard error; MOOD = any mood disorder; ANX = any anxiety disorder; SUD = any substance use disorder; STRESS = any stress-related disorder;<br/> SCZ = schizophrenia; PERS = any personality disorder. All estimates conditional on all other covariates included in the model.</p> |      |      |   |      |      |   |      |      |   |      |      |   |      |      |   |      |      |   |

**10 ETABLE 5: ADJUSTED ESTIMATES OF RISK FOR PSYCHIATRIC DISORDERS (4+ ICD CODES)**

|                                  | MOOD |      | ANX  |      |      | SUD  |      | STRESS |      | SCZ  |      | PERS |      |      |      |      |      |   |
|----------------------------------|------|------|------|------|------|------|------|--------|------|------|------|------|------|------|------|------|------|---|
|                                  | OR   | SE   | OR   | SE   |      | OR   | SE   | OR     | SE   | OR   | SE   | OR   | SE   |      |      |      |      |   |
| Female (ref)                     | -    | -    | -    | -    |      | -    | -    | -      | -    | -    | -    | -    | -    |      |      |      |      |   |
| Male                             | 0.87 | 0.08 | 0.80 | 0.08 | *    | 1.28 | 0.09 | *      | 0.88 | 0.14 | 1.06 | 0.23 | 0.58 | 0.30 |      |      |      |   |
| Neither male nor female selected | 1.03 | 0.06 | 1.00 | 0.07 |      | 1.21 | 0.08 |        | 1.00 | 0.13 | 1.16 | 0.22 | 0.38 | 0.38 |      |      |      |   |
| Woman (ref)                      | -    | -    | -    | -    |      | -    | -    |        | -    | -    | -    | -    | -    |      |      |      |      |   |
| Man                              | 0.80 | 0.08 | *    | 0.81 | 0.08 | 1.23 | 0.09 |        | 1.13 | 0.14 | 1.76 | 0.23 | 1.17 | 0.31 |      |      |      |   |
| Neither man nor women selected   | 0.97 | 0.05 |      | 0.95 | 0.06 | 1.15 | 0.07 |        | 1.31 | 0.10 | *    | 1.33 | 0.19 | 1.74 | 0.19 | *    |      |   |
| Straight/Heterosexual            | -    | -    | -    | -    |      | -    | -    |        | -    | -    | -    | -    | -    |      |      |      |      |   |
| Other than straight/heterosexual | 1.37 | 0.02 | *    | 1.27 | 0.02 | *    | 1.20 | 0.02   | *    | 1.46 | 0.04 | *    | 1.57 | 0.06 | *    | 1.92 | 0.08 | * |
| Age 18-29 (ref)                  | -    | -    | -    | -    |      | -    | -    |        | -    | -    | -    | -    | -    |      |      |      |      |   |
| Age 30-44                        | 1.69 | 0.03 | *    | 1.58 | 0.03 | *    | 2.43 | 0.03   | *    | 1.67 | 0.05 | *    | 2.61 | 0.09 | *    | 1.34 | 0.10 | * |
| Age 45-64                        | 2.11 | 0.02 | *    | 1.58 | 0.03 | *    | 2.72 | 0.03   | *    | 1.78 | 0.05 | *    | 2.79 | 0.09 | *    | 1.14 | 0.10 |   |
| Age 65 and older                 | 1.62 | 0.03 | *    | 1.11 | 0.03 | *    | 1.33 | 0.04   | *    | 1.22 | 0.06 | *    | 1.24 | 0.12 |      | 0.44 | 0.15 | * |
| Non-Hispanic White (ref)         | -    | -    | -    | -    |      | -    | -    |        | -    | -    | -    | -    | -    |      |      |      |      |   |
| Black/African American           | 0.51 | 0.02 | *    | 0.39 | 0.02 | *    | 0.65 | 0.02   | *    | 0.62 | 0.04 | *    | 1.21 | 0.06 | *    | 0.31 | 0.10 | * |
| Hispanic/Latino/a/x              | 0.71 | 0.02 | *    | 0.64 | 0.02 | *    | 0.68 | 0.03   | *    | 0.71 | 0.05 | *    | 1.08 | 0.08 |      | 0.42 | 0.12 | * |
| Asian                            | 0.45 | 0.06 | *    | 0.41 | 0.07 | *    | 0.38 | 0.12   | *    | 0.58 | 0.12 | *    | 0.48 | 0.36 |      | 0.28 | 0.39 | * |
| Other race-ethnicity             | 0.94 | 0.05 |      | 0.82 | 0.05 | *    | 1.09 | 0.06   |      | 0.95 | 0.10 |      | 1.34 | 0.17 |      | 0.56 | 0.26 |   |
| Multiracial                      | 0.85 | 0.05 | *    | 0.81 | 0.05 | *    | 0.97 | 0.07   |      | 1.11 | 0.10 |      | 1.80 | 0.16 | *    | 0.78 | 0.22 |   |
| No race-ethnicity listed         | 0.84 | 0.05 | *    | 0.76 | 0.05 | *    | 1.00 | 0.06   |      | 0.82 | 0.10 |      | 1.51 | 0.14 | *    | 0.61 | 0.23 |   |
| US born (ref)                    | -    | -    | -    | -    |      | -    | -    |        | -    | -    | -    | -    | -    |      |      |      |      |   |
| Foreign born                     | 0.66 | 0.03 | *    | 0.60 | 0.03 | *    | 0.35 | 0.04   | *    | 0.60 | 0.06 | *    | 0.47 | 0.11 | *    | 0.57 | 0.15 | * |
| No birthplace reported           | 0.99 | 0.06 |      | 0.91 | 0.07 |      | 1.09 | 0.07   |      | 0.82 | 0.13 |      | 1.18 | 0.17 |      | 0.96 | 0.30 |   |
| Less than HS (ref)               | -    | -    | -    | -    |      | -    | -    |        | -    | -    | -    | -    | -    |      |      |      |      |   |
| HS diploma or equivalent         | 0.96 | 0.02 |      | 1.01 | 0.03 |      | 0.82 | 0.03   | *    | 1.03 | 0.05 |      | 0.77 | 0.06 | *    | 0.90 | 0.12 |   |
| Some college                     | 0.96 | 0.02 |      | 1.02 | 0.03 |      | 0.66 | 0.03   | *    | 1.08 | 0.05 |      | 0.57 | 0.07 | *    | 1.09 | 0.12 |   |
| College degree or higher         | 0.68 | 0.03 | *    | 0.73 | 0.03 | *    | 0.27 | 0.04   | *    | 0.78 | 0.05 | *    | 0.37 | 0.10 | *    | 0.60 | 0.13 | * |
| No education reported            | 0.89 | 0.05 |      | 0.89 | 0.06 |      | 0.91 | 0.05   |      | 0.87 | 0.10 |      | 0.75 | 0.12 |      | 0.97 | 0.23 |   |
|                                  | 0.96 | 0.02 |      | 1.01 | 0.03 |      | 0.82 | 0.03   | *    | 1.03 | 0.05 |      | 0.77 | 0.06 | *    | 0.90 | 0.12 |   |
| Income less than 25K (ref)       | -    | -    | -    | -    |      | -    | -    |        | -    | -    | -    | -    | -    |      |      |      |      |   |
| Income 25-50K                    | 0.66 | 0.02 | *    | 0.73 | 0.02 | *    | 0.52 | 0.03   | *    | 0.66 | 0.04 | *    | 0.36 | 0.09 | *    | 0.53 | 0.10 | * |
| Income 50-75K                    | 0.53 | 0.03 | *    | 0.61 | 0.03 | *    | 0.33 | 0.04   | *    | 0.62 | 0.05 | *    | 0.16 | 0.18 | *    | 0.37 | 0.14 | * |
| Income 75-100K                   | 0.42 | 0.03 | *    | 0.52 | 0.03 | *    | 0.25 | 0.06   | *    | 0.46 | 0.07 | *    | 0.09 | 0.29 | *    | 0.26 | 0.19 | * |
| Income 100K or more              | 0.30 | 0.03 | *    | 0.39 | 0.03 | *    | 0.15 | 0.05   | *    | 0.34 | 0.06 | *    | 0.04 | 0.29 | *    | 0.11 | 0.21 | * |
| No income reported               | 0.64 | 0.02 | *    | 0.71 | 0.02 | *    | 0.71 | 0.02   | *    | 0.67 | 0.04 | *    | 0.69 | 0.06 | *    | 0.66 | 0.09 | * |

|                                                                                                                                                                                                                                                                                                                                                         |      |      |   |      |      |   |      |      |   |      |      |   |      |      |   |      |      |   |
|---------------------------------------------------------------------------------------------------------------------------------------------------------------------------------------------------------------------------------------------------------------------------------------------------------------------------------------------------------|------|------|---|------|------|---|------|------|---|------|------|---|------|------|---|------|------|---|
| Have health insurance (ref)                                                                                                                                                                                                                                                                                                                             | -    | -    |   | -    | -    |   | -    | -    |   | -    | -    |   | -    | -    |   | -    | -    |   |
| No health insurance                                                                                                                                                                                                                                                                                                                                     | 0.41 | 0.03 | * | 0.43 | 0.04 | * | 0.36 | 0.04 | * | 0.59 | 0.06 | * | 0.30 | 0.11 | * | 0.58 | 0.14 | * |
| No health insurance info reported                                                                                                                                                                                                                                                                                                                       | 0.66 | 0.05 | * | 0.70 | 0.05 | * | 0.69 | 0.05 | * | 0.75 | 0.09 | * | 0.71 | 0.12 | * | 0.56 | 0.23 |   |
|                                                                                                                                                                                                                                                                                                                                                         |      |      |   |      |      |   |      |      |   |      |      |   |      |      |   |      |      |   |
| Married (ref)                                                                                                                                                                                                                                                                                                                                           | 1.14 | 0.03 | * | 1.10 | 0.03 | * | 1.86 | 0.04 | * | 1.17 | 0.06 |   | 1.64 | 0.12 | * | 1.15 | 0.15 |   |
| Cohabiting                                                                                                                                                                                                                                                                                                                                              | 1.43 | 0.02 | * | 1.30 | 0.02 | * | 1.99 | 0.03 | * | 1.58 | 0.04 | * | 2.21 | 0.09 | * | 2.27 | 0.11 | * |
| Divorced                                                                                                                                                                                                                                                                                                                                                | 1.24 | 0.02 | * | 1.11 | 0.02 | * | 1.83 | 0.03 | * | 1.20 | 0.04 | * | 2.54 | 0.09 | * | 1.70 | 0.11 | * |
| Never married                                                                                                                                                                                                                                                                                                                                           | 1.43 | 0.03 | * | 1.21 | 0.04 | * | 2.07 | 0.04 | * | 1.53 | 0.07 | * | 2.12 | 0.12 | * | 2.19 | 0.16 | * |
| Separated                                                                                                                                                                                                                                                                                                                                               | 1.33 | 0.03 | * | 1.14 | 0.03 | * | 1.79 | 0.04 | * | 1.34 | 0.06 | * | 2.15 | 0.13 | * | 1.29 | 0.19 |   |
| Widowed                                                                                                                                                                                                                                                                                                                                                 | 1.20 | 0.04 | * | 1.17 | 0.05 | * | 1.90 | 0.05 | * | 1.46 | 0.08 | * | 2.55 | 0.13 | * | 2.35 | 0.18 | * |
| No marital info reported                                                                                                                                                                                                                                                                                                                                | 1.14 | 0.03 | * | 1.10 | 0.03 | * | 1.86 | 0.04 | * | 1.17 | 0.06 |   | 1.64 | 0.12 | * | 1.15 | 0.15 |   |
|                                                                                                                                                                                                                                                                                                                                                         |      |      |   |      |      |   |      |      |   |      |      |   |      |      |   |      |      |   |
| <p>* <math>p &lt; .05/6 = .0083</math><br/> OR = odds ratio; SE = standard error; MOOD = any mood disorder; ANX = any anxiety disorder; SUD = any substance use disorder; STRESS = any stress-related disorder;<br/> SCZ = schizophrenia; PERS = any personality disorder. All estimates conditional on all other covariates included in the model.</p> |      |      |   |      |      |   |      |      |   |      |      |   |      |      |   |      |      |   |
